# Supplementary material for: Tissue specific regulation of transcription in endometrium and association with disease
Source: PubMed Central journal article supplement — Hum Reprod. 2020 Feb 26;35(2):377–93. doi: 10.1093/humrep/dez279 (PMC7048713; doi:10.1093/humrep/dez279), 2020-02-26
Supplement: suppf1_dez279.pdf [file suppf1_dez279.pdf]

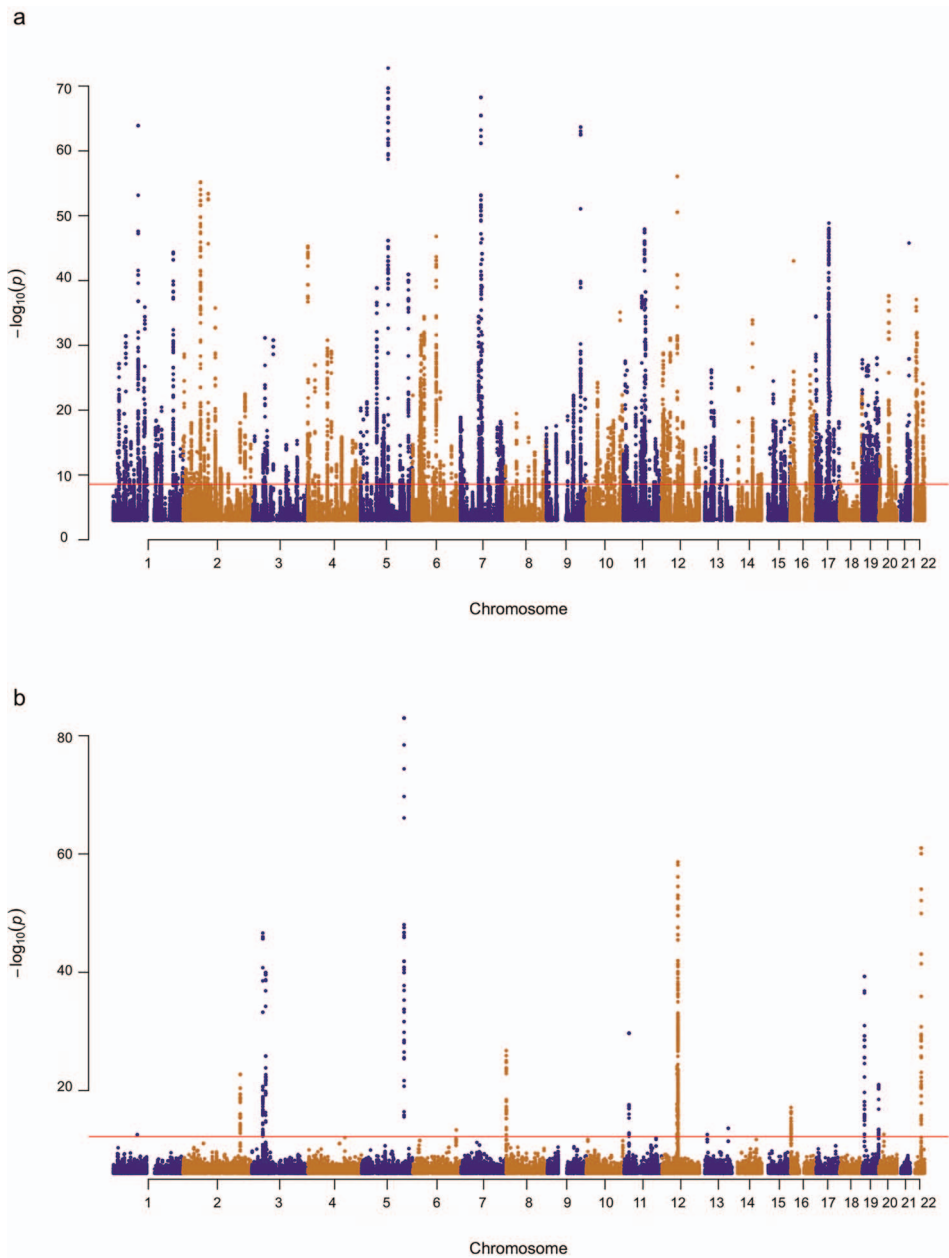

**Supplementary Figure S1 Association between SNPs and endometrial gene expression.** Manhattan plots showing the strength of association between SNPs and gene expression endometrium for both cis-eQTLs (a) and trans-eQTLs (b). Each point on the plots represents a SNP and alternating colours distinguish different chromosomes. The red line represents the Bonferroni significance cut off of P.
