# Supplementary material for: Tissue specific regulation of transcription in endometrium and association with disease
Source: PubMed Central journal article supplement — Hum Reprod. 2020 Feb 26;35(2):377–93. doi: 10.1093/humrep/dez279 (PMC7048713; doi:10.1093/humrep/dez279), 2020-02-26
Supplement: suppf5_dez279.pdf [file suppf5_dez279.pdf]

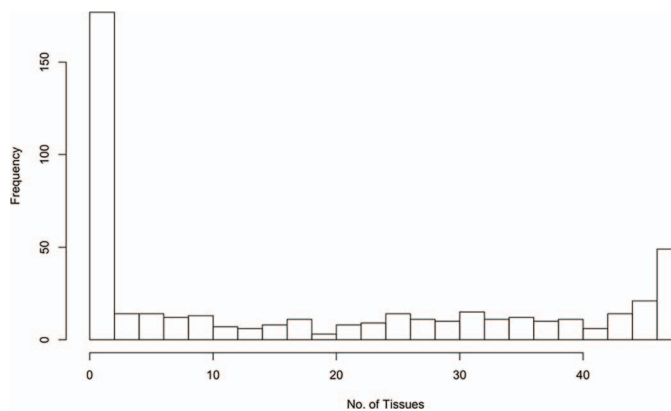

**Supplementary Figure S5 cis-eQTL tissue frequency.** Frequency of endometrial cis-eQTLs in 48 GTEx tissues.
