# Supplementary material for: Tissue specific regulation of transcription in endometrium and association with disease
Source: PubMed Central journal article supplement — Hum Reprod. 2020 Feb 26;35(2):377–93. doi: 10.1093/humrep/dez279 (PMC7048713; doi:10.1093/humrep/dez279), 2020-02-26
Supplement: suppf6_dez279.pdf [file suppf6_dez279.pdf]

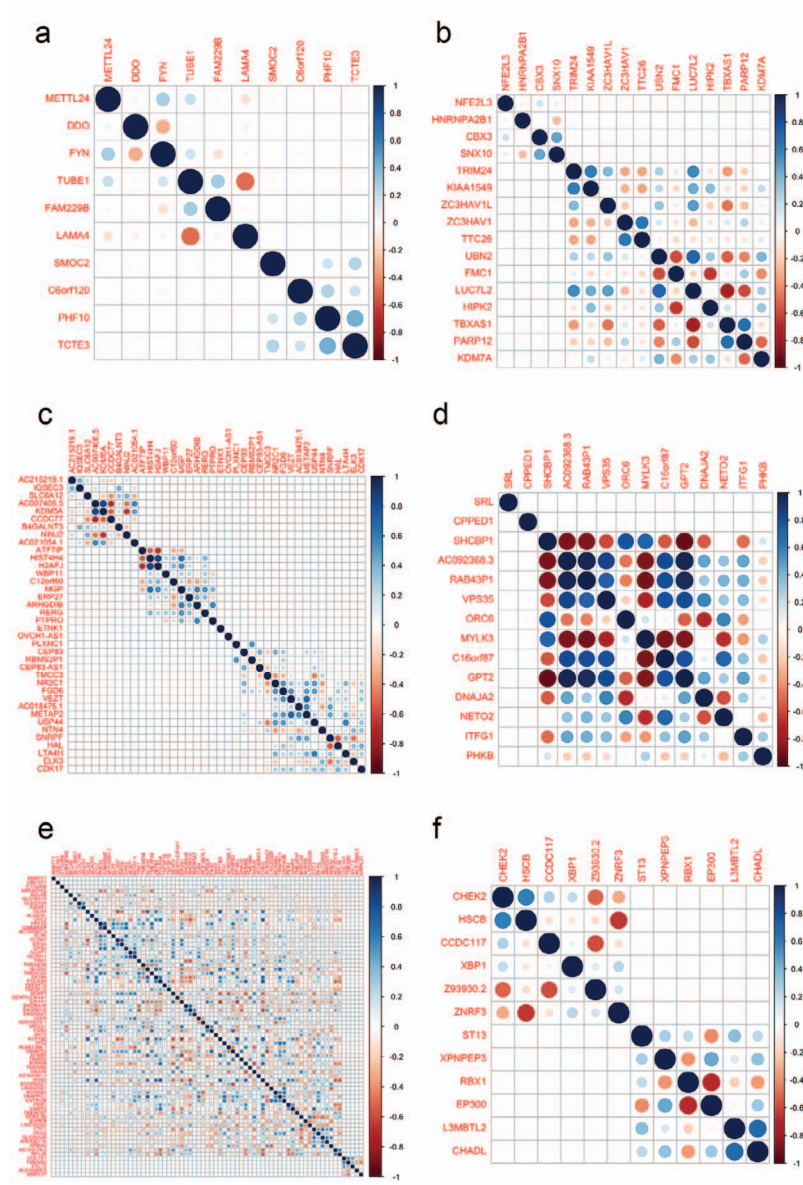

**Supplementary Figure S6 Correlation between significant TWAS genes.** Correlation plots showing the Pearson correlation between the predicted expression of genes at loci significantly associated with endometriosis in the TWAS analysis on chromosomes 6 (a), 7(b), 12(c), 16(d), 17(e) and 22(f).
