# Supplementary material for: Tissue specific regulation of transcription in endometrium and association with disease
Source: PubMed Central journal article supplement — Hum Reprod. 2020 Feb 26;35(2):377–93. doi: 10.1093/humrep/dez279 (PMC7048713; doi:10.1093/humrep/dez279), 2020-02-26
Supplement: suppf7_dez279.pdf [file suppf7_dez279.pdf]

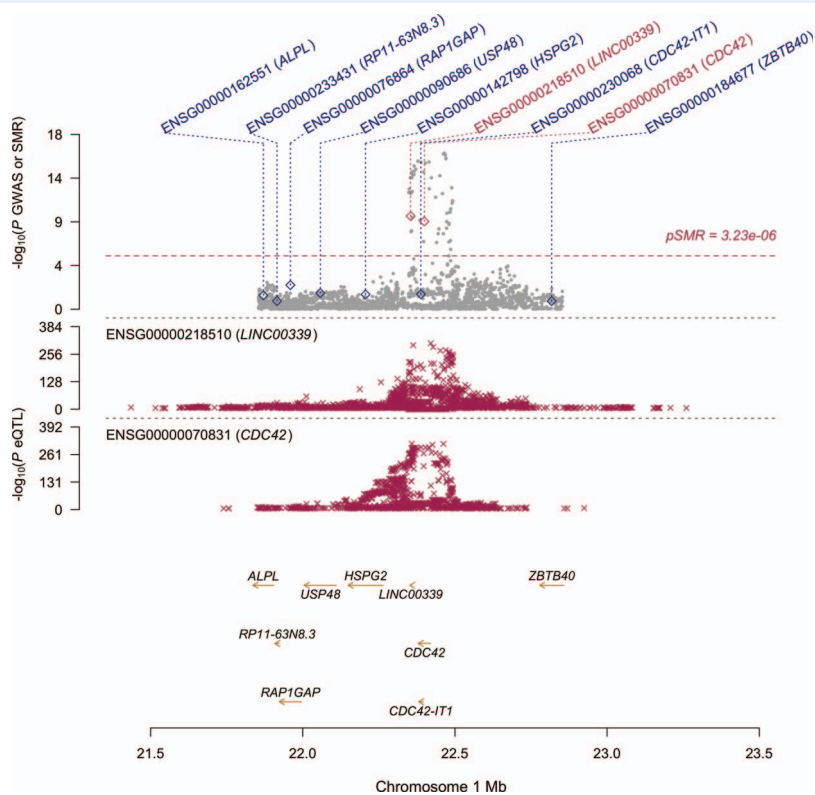

**Supplementary Figure S7 SMR locus plot of the *CDC42/LINC00339* locus.** In the top plot, grey dots represent P-values for SNPs reported in *Sapkota et al.'s* (2017) GWAS meta-analysis for endometriosis and diamonds represent the P-values for probes from the multi-SNP-based SMR test. Crosses in the middle and bottom plots represent the eQTL P-values of SNPs associated with expression of *LINC00339* and *CDC42* in blood respectively. Positions are in hg19.
