# Supplementary material for: Tissue specific regulation of transcription in endometrium and association with disease
Source: PubMed Central journal article supplement — Hum Reprod. 2020 Feb 26;35(2):377–93. doi: 10.1093/humrep/dez279 (PMC7048713; doi:10.1093/humrep/dez279), 2020-02-26
Supplement: suppf8_dez279.pdf [file suppf8_dez279.pdf]

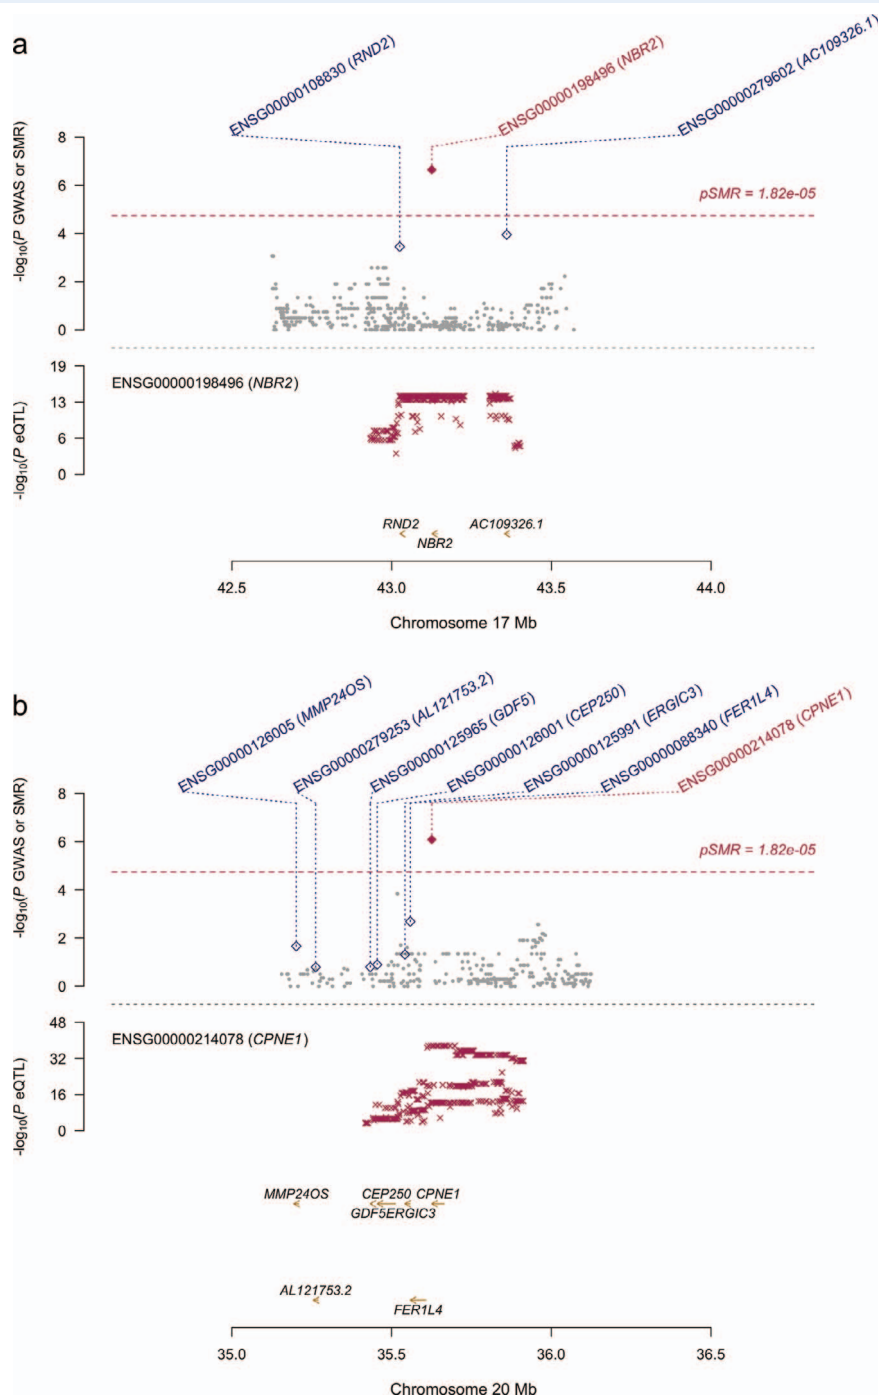

**Supplementary Figure S8** SMR locus plots for *NBR2* and *CPNE1*. The grey dots represent P-values for SNPs reported in the Day et al. GWAS meta-analysis for menopause and diamonds represent the P-values for probes from the SMR test. Crosses represent the eQTL P-values of SNPs associated with expression of *NBR2* (a) and *CPNE1* (b) in endometrium. Positions are in hg38.
