# Supplementary material for: Tissue specific regulation of transcription in endometrium and association with disease
Source: PubMed Central journal article supplement — Hum Reprod. 2020 Feb 26;35(2):377–93. doi: 10.1093/humrep/dez279 (PMC7048713; doi:10.1093/humrep/dez279), 2020-02-26
Supplement: suppf9_dez279.pdf [file suppf9_dez279.pdf]

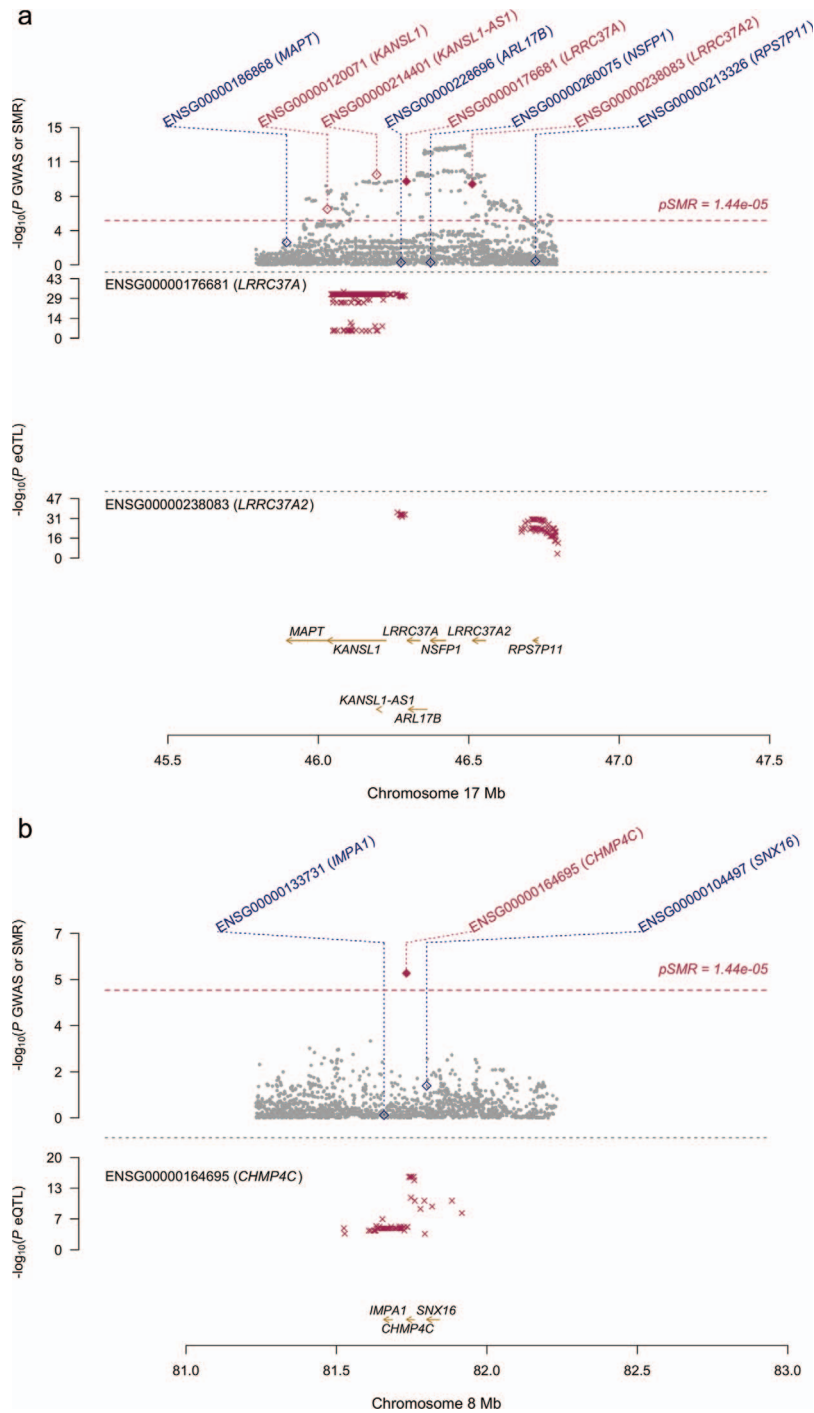

**Supplementary Figure S9 SMR locus plots for LRR37A, LRR37A2 and CHMP4C.** The grey dots represent P-values for SNPs reported in the Phelan et al. GWAS meta-analysis for epithelial ovarian cancer and diamonds represent the P-values for probes from the SMR test. Crosses represent the eQTL P-values of SNPs associated with expression LRR37A and LRR37A2 (a) and CHMP4C (b) in endometrium. Positions are in hg38.
