# Supplementary material for: Tissue specific regulation of transcription in endometrium and association with disease
Source: PubMed Central journal article supplement — Hum Reprod. 2020 Feb 26;35(2):377–93. doi: 10.1093/humrep/dez279 (PMC7048713; doi:10.1093/humrep/dez279), 2020-02-26
Supplement: suppt1_dez279.pdf [file suppt1_dez279.pdf]

**Supplementary Table SI 48 GTEx tissues.**

| <b>Tissue</b>                         | <b>No.sample</b> |
|---------------------------------------|------------------|
| Adipose_Subcutaneous                  | 385              |
| Adipose_Visceral_Omentum              | 313              |
| Adrenal_Gland                         | 175              |
| Artery_Aorta                          | 267              |
| Artery_Coronary                       | 152              |
| Artery_Tibial                         | 388              |
| Brain_Amygdala                        | 88               |
| Brain_Anterior_cingulate_cortex_BA24  | 109              |
| Brain_Caudate_basal_ganglia           | 144              |
| Brain_Cerebellar_Hemisphere           | 125              |
| Brain_Cerebellum                      | 154              |
| Brain_Cortex                          | 136              |
| Brain_Frontal_Cortex_BA9              | 118              |
| Brain_Hippocampus                     | 111              |
| Brain_Hypothalamus                    | 108              |
| Brain_Nucleus_accumbens_basal_ganglia | 130              |
| Brain_Putamen_basal_ganglia           | 111              |
| Brain_Spinal_cord_cervical_c-I        | 83               |
| Brain_Substantia_nigra                | 80               |
| Breast_Mammary_Tissue                 | 251              |
| Cells_EBV-transformed_lymphocytes     | 117              |
| Cells_Transformed_fibroblasts         | 300              |
| Colon_Sigmoid                         | 203              |
| Colon_Transverse                      | 246              |
| Esophagus_Gastroesophageal_Junction   | 213              |
| Esophagus_Mucosa                      | 358              |
| Esophagus_Muscularis                  | 335              |
| Heart_Atrial_Appendage                | 264              |
| Heart_Left_Ventricle                  | 272              |
| Liver                                 | 153              |
| Lung                                  | 383              |
| Minor_Salivary_Gland                  | 85               |
| Muscle_Skeletal                       | 491              |
| Nerve_Tibial                          | 361              |
| Ovary                                 | 122              |
| Pancreas                              | 220              |
| Pituitary                             | 157              |
| Prostate                              | 132              |

(Continued)

---

**Supplementary Table S1 Continued.**

| <b>Tissue</b>                   | <b>No.sample</b> |
|---------------------------------|------------------|
| Skin_Not_Sun_Exposed_Suprapubic | 335              |
| Skin_Sun_Exposed_Lower_leg      | 414              |
| Small_Intestine_Terminal_Ileum  | 122              |
| Spleen                          | 146              |
| Stomach                         | 237              |
| Testis                          | 225              |
| Thyroid                         | 399              |
| Uterus                          | 101              |
| Vagina                          | 106              |
| Whole_Blood                     | 369              |

List of GTEx tissues used in this study and number of samples within each tissue.
