# Supplementary material for: Tissue specific regulation of transcription in endometrium and association with disease
Source: PubMed Central journal article supplement — Hum Reprod. 2020 Feb 26;35(2):377–93. doi: 10.1093/humrep/dez279 (PMC7048713; doi:10.1093/humrep/dez279), 2020-02-26
Supplement: suppt2_dez279.pdf [file suppt2_dez279.pdf]

**Supplementary Table SII Correlation between eQTLs in endometrium and GTEx tissues.**

| Tissue                                | No.sample | rb    | se_rb | Biological System         | Development Lineage |
|---------------------------------------|-----------|-------|-------|---------------------------|---------------------|
| Whole_Blood                           | 369       | 0.605 | 0.019 |                           | Mesoderm            |
| eQTLGen_Blood                         | 31 684    | 0.592 | 0.018 | Heamatopoietic            | Mesoderm            |
| Spleen                                | 146       | 0.632 | 0.017 |                           | Mesoderm            |
| Thyroid                               | 399       | 0.658 | 0.015 |                           | Endoderm            |
| Pituitary                             | 157       | 0.631 | 0.016 | Endocrine                 | Ectoderm            |
| Prostate                              | 132       | 0.693 | 0.016 |                           | Endoderm            |
| Adrenal_Gland                         | 175       | 0.705 | 0.014 |                           | Ectoderm            |
| Lung                                  | 383       | 0.690 | 0.014 | Respiratory System        | Endoderm            |
| Artery_Aorta                          | 267       | 0.689 | 0.014 |                           | Mesoderm            |
| Artery_Coronary                       | 152       | 0.697 | 0.015 |                           | Mesoderm            |
| Artery_Tibial                         | 388       | 0.685 | 0.014 | Cardiovascular            | Mesoderm            |
| Heart_Atrial_Appendage                | 264       | 0.682 | 0.014 |                           | Mesoderm            |
| Heart_Left_Ventricle                  | 272       | 0.675 | 0.015 |                           | Mesoderm            |
| Skin_Not_Sun_Exposed_Suprapubic       | 335       | 0.676 | 0.015 | Integumentary system      | Ectoderm            |
| Skin_Sun_Exposed_Lower_leg            | 414       | 0.675 | 0.014 |                           | Ectoderm            |
| Muscle_Skeletal                       | 491       | 0.637 | 0.017 |                           | Mesoderm            |
| Adipose_Subcutaneous                  | 385       | 0.688 | 0.014 | Musculoskeletal           | Mesoderm            |
| Adipose_Visceral_Omentum              | 313       | 0.704 | 0.014 |                           | Mesoderm            |
| Nerve_Tibial                          | 361       | 0.647 | 0.014 | Peripheral nervous system | Ectoderm            |
| Brain_Amygdala                        | 88        | 0.636 | 0.016 |                           | Ectoderm            |
| Brain_Anterior_cingulate_cortex_BA24  | 109       | 0.621 | 0.016 |                           | Ectoderm            |
| Brain_Caudate_basal_ganglia           | 144       | 0.629 | 0.015 |                           | Ectoderm            |
| Brain_Cerebellar_Hemisphere           | 125       | 0.556 | 0.018 |                           | Ectoderm            |
| Brain_Cerebellum                      | 154       | 0.536 | 0.017 |                           | Ectoderm            |
| Brain_Cortex                          | 136       | 0.604 | 0.015 |                           | Ectoderm            |
| Brain_Frontal_Cortex_BA9              | 118       | 0.611 | 0.015 | Central nervous system    | Ectoderm            |
| Brain_Hippocampus                     | 111       | 0.634 | 0.016 |                           | Ectoderm            |
| Brain_Hypothalamus                    | 108       | 0.633 | 0.016 |                           | Ectoderm            |
| Brain_Nucleus_accumbens_basal_ganglia | 130       | 0.623 | 0.015 |                           | Ectoderm            |
| Brain_Putamen_basal_ganglia           | 111       | 0.626 | 0.016 |                           | Ectoderm            |
| Brain_Spinal_cord_cervical_c-1        | 83        | 0.657 | 0.016 |                           | Ectoderm            |
| Brain_Substantia_nigra                | 80        | 0.644 | 0.017 |                           | Ectoderm            |

(Continued)

**Supplementary Table SII Continued.**

| <b>Tissue</b>                       | <b>No.sample</b> | <b>rb</b> | <b>se_rb</b> | <b>Biological System</b>   | <b>Development Lineage</b> |
|-------------------------------------|------------------|-----------|--------------|----------------------------|----------------------------|
| Esophagus_Gastroesophageal_Junction | 213              | 0.693     | 0.014        |                            | Endoderm                   |
| Esophagus_Mucosa                    | 358              | 0.693     | 0.014        |                            | Endoderm                   |
| Esophagus_Muscularis                | 335              | 0.682     | 0.014        |                            | Endoderm                   |
| Stomach                             | 237              | 0.723     | 0.014        |                            | Endoderm                   |
| Small_Intestine_Terminal_Ileum      | 122              | 0.699     | 0.016        | Digestive system           | Endoderm                   |
| Colon_Sigmoid                       | 203              | 0.685     | 0.014        |                            | Endoderm                   |
| Colon_Transverse                    | 246              | 0.714     | 0.014        |                            | Endoderm                   |
| Minor_Salivary_Gland                | 85               | 0.724     | 0.015        |                            | Endoderm                   |
| Pancreas                            | 220              | 0.673     | 0.015        |                            | Endoderm                   |
| Liver                               | 153              | 0.638     | 0.019        | Hepatic                    | Endoderm                   |
| Testis                              | 225              | 0.539     | 0.020        | Male reproductive system   | Mesoderm                   |
| Uterus                              | 101              | 0.706     | 0.016        |                            | Mesoderm                   |
| Vagina                              | 106              | 0.708     | 0.016        |                            | Mesoderm                   |
| Ovary                               | 122              | 0.682     | 0.016        | Female reproductive system | Mesoderm                   |
| Breast_Mammary_Tissue               | 251              | 0.705     | 0.014        |                            | Mesoderm                   |
| Cells_Transformed_fibroblasts       | 300              | 0.716     | 0.013        | Individual cells           | -                          |
| Cells_EBV-transformed_lymphocytes   | 117              | 0.658     | 0.018        | Individual cells           | Mesoderm                   |

Correlation (rb) of endometrial eQTLs with 48 GTEx Tissues and eQTLGen blood eQTLs. Each tissue is grouped into a biological system and development lineage.
