# Supplementary material for: Tissue specific regulation of transcription in endometrium and association with disease
Source: PubMed Central journal article supplement — Hum Reprod. 2020 Feb 26;35(2):377–93. doi: 10.1093/humrep/dez279 (PMC7048713; doi:10.1093/humrep/dez279), 2020-02-26
Supplement: suppt3_dez279.pdf [file suppt3_dez279.pdf]

**Supplementary Table SIII Tissue-specific independent cis-eQTLs in endometrium.**

| Signal_Type | Chromosome | Gene_ID         | Gene_Symbol   | SNP         | SNP_BP    | hg19_SNP_BP | Effect Allele | Beta   | se    | Pvalue   |
|-------------|------------|-----------------|---------------|-------------|-----------|-------------|---------------|--------|-------|----------|
| Primary     | 7          | ENSG0000002726  | AOCI          | rs2888675   | 150844993 | 150542081   | T             | 1.262  | 0.163 | 5.52E-13 |
| Primary     | 7          | ENSG00000005108 | THSD7A        | rs10216130  | 11522803  | 11562430    | C             | -0.677 | 0.102 | 3.52E-10 |
| Primary     | 19         | ENSG00000012124 | CD22          | rs10411704  | 35309759  | 35800662    | T             | -1.362 | 0.148 | 9.28E-17 |
| Primary     | 16         | ENSG00000015413 | DPEP1         | rs56164821  | 89606668  | 89673076    | A             | -0.626 | 0.099 | 1.69E-09 |
| Primary     | 8          | ENSG00000029534 | ANK1          | rs140702866 | 41632336  | 41489855    | G             | -2.079 | 0.300 | 7.08E-11 |
| Primary     | 1          | ENSG00000034971 | MYOC          | rs235866    | 171666864 | 171636004   | C             | -1.335 | 0.124 | 3.54E-21 |
| Primary     | 2          | ENSG00000068781 | STON1-GTF2A1L | rs2140551   | 48595242  | 48822381    | A             | 1.343  | 0.162 | 2.60E-14 |
| Primary     | 18         | ENSG00000079101 | CLU1L1        | rs1786127   | 587120    | 587120      | T             | -0.752 | 0.118 | 1.38E-09 |
| Primary     | 19         | ENSG00000105136 | ZNF419        | rs10221501  | 57495307  | 58006675    | A             | 0.426  | 0.049 | 1.14E-15 |
| Primary     | 11         | ENSG00000110660 | SLC35F2       | rs537312    | 107784145 | 107654871   | C             | -0.264 | 0.041 | 1.20E-09 |
| Primary     | 1          | ENSG00000121769 | FABP3         | rs115552871 | 31330095  | 31802942    | C             | -2.205 | 0.335 | 4.85E-10 |
| Primary     | 6          | ENSG00000124588 | NQO2          | rs4149358   | 3003736   | 3003970     | A             | 0.423  | 0.037 | 5.27E-23 |
| Primary     | 11         | ENSG00000131620 | ANO1          | rs7949333   | 70070640  | 69916746    | C             | 0.447  | 0.070 | 1.75E-09 |
| Primary     | 5          | ENSG00000133710 | SPINK5        | rs10067434  | 148025899 | 147405462   | T             | -1.361 | 0.186 | 8.24E-12 |
| Primary     | 6          | ENSG00000137411 | VARS2         | rs2249464   | 30920384  | 30888161    | C             | 0.229  | 0.029 | 2.37E-13 |
| Primary     | 15         | ENSG00000137825 | ITPKA         | rs116922776 | 41703122  | 41995320    | A             | 3.127  | 0.464 | 1.92E-10 |
| Primary     | 2          | ENSG00000144488 | ESPNL         | rs12471185  | 238127296 | 239035937   | G             | -1.087 | 0.125 | 1.93E-15 |
| Primary     | 11         | ENSG00000149328 | GLB1L2        | rs10791356  | 134351953 | 134221847   | G             | -0.594 | 0.089 | 2.53E-10 |
| Primary     | 3          | ENSG00000151967 | SCHIP1        | rs13088856  | 159837169 | 159554958   | T             | 0.435  | 0.049 | 5.15E-16 |
| Primary     | 12         | ENSG00000153179 | RASSF3        | rs12426110  | 64703518  | 65097298    | G             | -0.447 | 0.060 | 4.52E-12 |
| Primary     | 5          | ENSG00000154162 | CDH12         | rs11740896  | 22177378  | 22177487    | C             | 2.105  | 0.191 | 5.41E-22 |
| Primary     | 7          | ENSG00000159860 | TCAF2P1       | rs12540107  | 143728285 | 143425378   | T             | 0.514  | 0.066 | 4.34E-13 |
| Primary     | 6          | ENSG00000164440 | TXLNB         | rs12524691  | 139294816 | 139615953   | T             | -0.840 | 0.098 | 3.57E-15 |
| Primary     | 11         | ENSG00000165323 | FAT3          | rs114973944 | 92115661  | 91848827    | T             | -3.791 | 0.380 | 5.20E-19 |
| Primary     | 19         | ENSG00000171903 | CYP4F11       | rs12985091  | 15934939  | 16045749    | G             | 2.074  | 0.162 | 2.82E-27 |
| Primary     | 4          | ENSG00000174227 | PIGG          | rs77516519  | 521454    | 515243      | A             | -0.267 | 0.041 | 5.26E-10 |
| Primary     | 8          | ENSG00000176406 | RIMS2         | rs10097034  | 103488759 | 104500987   | C             | -0.877 | 0.107 | 3.19E-14 |
| Primary     | 11         | ENSG00000184795 | UNC93B5       | rs58894895  | 67762473  | 67529944    | C             | 3.018  | 0.457 | 4.06E-10 |
| Primary     | 8          | ENSG00000197140 | ADAM32        | rs11985898  | 39108494  | 38966013    | A             | 0.456  | 0.044 | 3.49E-20 |
| Primary     | 6          | ENSG00000204525 | HLA-C         | rs1130838   | 31269347  | 31237124    | C             | -0.562 | 0.052 | 3.13E-21 |
| Primary     | 7          | ENSG00000207217 | SNORA80D      | rs10255418  | 6031225   | 6070856     | C             | 1.036  | 0.109 | 1.15E-17 |
| Primary     | 9          | ENSG00000226721 | EEF1DP2       | rs10821027  | 92844801  | 95607083    | C             | 0.421  | 0.054 | 3.75E-13 |
| Primary     | 13         | ENSG00000234685 | NUS1P2        | rs9580453   | 22870149  | 23444288    | T             | -1.075 | 0.126 | 5.30E-15 |
| Primary     | 2          | ENSG00000237651 | C2orf74       | rs11125869  | 61152398  | 61379533    | A             | -0.982 | 0.043 | 7.02E-56 |
| Primary     | 4          | ENSG00000248763 | AC111000.2    | rs114278164 | 69115280  | 69980998    | G             | 1.874  | 0.149 | 1.33E-26 |

(Continued)

**Supplementary Table SIII Continued.**

| Signal_Type | Chromosome | Gene_ID          | Gene_Symbol  | SNP         | SNP_BP    | hg19_SNP_BP | Effect Allele | Beta   | se    | Pvalue   |
|-------------|------------|------------------|--------------|-------------|-----------|-------------|---------------|--------|-------|----------|
| Primary     | 5          | ENSG00000253953  | PCDHGB4      | rs114223268 | 141375665 | 140755232   | C             | 3.871  | 0.600 | 9.71E-10 |
| Primary     | 17         | ENSG00000259024  | TVP23C-CDRT4 | rs236815    | 15565130  | 15468444    | C             | -1.120 | 0.176 | 1.41E-09 |
| Primary     | 8          | ENSG000000261150 | EPPK1        | rs59265584  | 143876547 | 144950715   | T             | 0.701  | 0.112 | 2.48E-09 |
| Primary     | 6          | ENSG00000263426  | RN7SL47IP    | rs114146785 | 28829320  | 28797097    | A             | -1.551 | 0.184 | 1.12E-14 |
| Primary     | 10         | ENSG00000271816  | BMSIP4       | rs10824031  | 73749515  | 75509273    | T             | 0.526  | 0.081 | 7.55E-10 |
| Primary     | 18         | ENSG00000271982  | SNORD58B     | rs112025123 | 49466373  | 46992743    | T             | -0.733 | 0.097 | 1.69E-12 |
| Primary     | 5          | ENSG00000272674  | PCDHB16      | rs11741863  | 141175025 | 140554606   | T             | 0.395  | 0.062 | 1.39E-09 |
| Primary     | 7          | ENSG00000272831  | AC027644.3   | rs7782418   | 66671294  | 66136281    | C             | -0.388 | 0.056 | 7.93E-11 |
| Primary     | 18         | ENSG00000274828  | AC068473.5   | rs2680752   | 79673717  | 77433717    | C             | 0.466  | 0.040 | 1.01E-23 |
| Primary     | 13         | ENSG00000275202  | ALI161421.1  | rs8248      | 48975435  | 49549571    | C             | 0.359  | 0.054 | 2.53E-10 |
| Primary     | 7          | ENSG00000277149  | TYW1B        | rs55931045  | 72737931  | 72202902    | T             | -0.924 | 0.033 | 5.62E-69 |
| Primary     | 15         | ENSG00000277782  | AC068870.2   | rs7172647   | 80992187  | 81284528    | C             | 0.573  | 0.057 | 4.61E-19 |
| Primary     | 17         | ENSG00000278311  | GGNBP2       | rs12601380  | 36549144  | 34904985    | A             | -0.096 | 0.015 | 3.71E-10 |
| Primary     | 11         | ENSG00000278376  | AP004609.3   | rs526850    | 118734418 | 118605127   | T             | -0.476 | 0.057 | 1.92E-14 |
| Primary     | 15         | ENSG00000278662  | GOLGA6L10    | rs62012043  | 82227302  | 82519643    | G             | 0.966  | 0.139 | 6.70E-11 |
| Primary     | 17         | ENSG00000278834  | AC073508.3   | rs1029792   | 40652689  | 38808941    | T             | 0.262  | 0.028 | 1.50E-17 |
| Primary     | 11         | ENSG00000278879  | AP000560.1   | rs10899059  | 75035508  | 74746553    | C             | -0.967 | 0.100 | 3.35E-18 |
| Primary     | 2          | ENSG00000279267  | AL078621.3   | rs1448867   | 113684769 | 114442346   | C             | -0.420 | 0.049 | 3.10E-15 |
| Primary     | 17         | ENSG00000279602  | AC109326.1   | rs12942870  | 43154243  | 41306260    | C             | 1.650  | 0.199 | 2.56E-14 |
| Primary     | 16         | ENSG00000279622  | AC025280.2   | rs1874010   | 84926818  | 84960424    | C             | -1.752 | 0.167 | 1.44E-20 |
| Primary     | 11         | ENSG00000279672  | AP006621.5   | rs4963153   | 791462    | 791462      | G             | -0.397 | 0.051 | 6.63E-13 |
| Primary     | 6          | ENSG00000280128  | AL662795.2   | rs4711213   | 30324559  | 30292336    | C             | 0.285  | 0.043 | 4.20E-10 |
| Primary     | 5          | ENSG00000280187  | AC022107.1   | rs350099    | 69166129  | 68461956    | T             | 0.254  | 0.039 | 5.15E-10 |
| Primary     | 1          | ENSG00000280670  | CCDC163      | rs10157597  | 45524606  | 45990278    | A             | -0.784 | 0.054 | 3.65E-32 |
| Primary     | 4          | ENSG00000281501  | SEPSACS-AS1  | rs60527077  | 25159917  | 25161539    | G             | 1.794  | 0.139 | 1.12E-27 |
| Primary     | 4          | ENSG00000283050  | GTF2IP12     | rs10434028  | 119373309 | 120294464   | T             | -0.474 | 0.052 | 1.41E-16 |
| Secondary   | 6          | ENSG0000179344   | H1A-DQB1     | rs2105902   | 32427921  | 32395698    | A             | 0.759  | 0.133 | 1.02E-08 |
| Secondary   | 6          | ENSG00000204525  | H1A-C        | rs9264419   | 31262360  | 31230137    | G             | 0.472  | 0.069 | 8.06E-12 |
| Secondary   | 7          | ENSG00000207217  | SNORA80D     | rs12532895  | 6003755   | 6043386     | G             | 1.045  | 0.177 | 3.61E-09 |
| Secondary   | 6          | ENSG00000232629  | H1A-DQB2     | rs1015575   | 32770338  | 32738115    | G             | 0.632  | 0.113 | 2.35E-08 |
| Secondary   | 18         | ENSG00000274828  | AC068473.5   | rs472369    | 79696581  | 77456581    | C             | 0.197  | 0.034 | 4.64E-09 |
| Secondary   | 17         | ENSG00000279602  | AC109326.1   | rs11656321  | 43362434  | 41439802    | G             | -0.696 | 0.114 | 1.19E-09 |
| Secondary   | 16         | ENSG00000279622  | AC025280.2   | rs9928433   | 84924808  | 84958414    | A             | -1.336 | 0.191 | 3.05E-12 |

Correlation (r<sub>b</sub>) of endometrial eQTLs with 48 GTEx Tissues and eQTLGen blood eQTLs. Each tissue is grouped into a biological system and development lineage
