# Supplementary material for: Tissue specific regulation of transcription in endometrium and association with disease
Source: PubMed Central journal article supplement — Hum Reprod. 2020 Feb 26;35(2):377–93. doi: 10.1093/humrep/dez279 (PMC7048713; doi:10.1093/humrep/dez279), 2020-02-26
Supplement: suppt4_dez279.pdf [file suppt4_dez279.pdf]

**Supplementary Table SIV** Transcriptome-wide significant genes associated with endometriosis.

| TargetID        | CHROM | Gene_Start (hg38) | Gene_End (hg38) | Zscore  | Pvalue   | GeneName   |
|-----------------|-------|-------------------|-----------------|---------|----------|------------|
| ENSG00000214199 | 2     | 106 697 331       | 106 698 676     | 5.495   | 3.90E-08 | EEF1A1P12  |
| ENSG00000144057 | 2     | 106 801 600       | 106 887 108     | 5.533   | 3.15E-08 | ST6GAL2    |
| ENSG00000187699 | 2     | 189 879 609       | 190 203 484     | -4.808  | 1.52E-06 | C2orf88    |
| ENSG00000114933 | 2     | 205 993 721       | 206 086 303     | 4.767   | 1.87E-06 | INO80D     |
| ENSG00000134853 | 4     | 54 229 097        | 54 298 247      | -11.049 | 0        | PDGFRA     |
| ENSG00000157404 | 4     | 54 657 918        | 54 740 715      | -5.189  | 2.11E-07 | KIT        |
| ENSG00000128052 | 4     | 55 078 477        | 55 125 589      | -5.047  | 4.48E-07 | KDR        |
| ENSG00000128039 | 4     | 55 346 109        | 55 373 096      | -5.027  | 4.99E-07 | SRD5A3     |
| ENSG00000134851 | 4     | 55 395 957        | 55 453 397      | -5.015  | 5.29E-07 | TMEM165    |
| ENSG00000134852 | 4     | 55 427 903        | 55 547 138      | -5.001  | 5.72E-07 | CLOCK      |
| ENSG00000090989 | 4     | 55 853 616        | 55 905 034      | -5.179  | 2.23E-07 | EXOC1      |
| ENSG00000174799 | 4     | 55 948 871        | 56 033 363      | -5.202  | 1.98E-07 | CEP135     |
| ENSG00000109265 | 4     | 56 049 073        | 56 328 625      | -4.911  | 9.06E-07 | KIAA1211   |
| ENSG00000109323 | 4     | 102 631 488       | 102 760 994     | -6.170  | 6.81E-10 | MANBA      |
| ENSG00000230069 | 4     | 102 727 274       | 102 730 721     | -6.289  | 3.19E-10 | LRRC37A15P |
| ENSG00000248971 | 4     | 102 728 746       | 102 730 171     | -6.280  | 3.37E-10 | KRT8P46    |
| ENSG00000109332 | 4     | 102 794 383       | 102 868 896     | -6.200  | 5.66E-10 | UBE2D3     |
| ENSG00000246560 | 4     | 102 828 055       | 102 844 075     | -6.113  | 9.79E-10 | AC018797.2 |
| ENSG00000145354 | 4     | 102 868 978       | 102 889 242     | -6.090  | 1.13E-09 | CISD2      |
| ENSG00000164037 | 4     | 102 885 048       | 103 019 739     | -5.778  | 7.56E-09 | SLC9B1     |
| ENSG00000174749 | 4     | 112 145 397       | 112 195 256     | -4.818  | 1.45E-06 | FAM241A    |
| ENSG00000145414 | 4     | 163 110 073       | 163 166 921     | -5.038  | 4.70E-07 | NAFI       |
| ENSG00000251141 | 5     | 44 744 900        | 44 808 777      | 4.817   | 1.46E-06 | MRPS30-DT  |
| ENSG00000112996 | 5     | 44 808 925        | 44 820 428      | 4.816   | 1.46E-06 | MRPS30     |
| ENSG00000272335 | 5     | 44 826 076        | 44 828 592      | 4.820   | 1.43E-06 | AC093297.2 |
| ENSG00000050748 | 5     | 180 233 143       | 180 292 099     | 5.087   | 3.64E-07 | MAPK9      |
| ENSG00000131459 | 5     | 180 300 690       | 180 353 387     | 5.091   | 3.56E-07 | GFPT2      |
| ENSG00000113300 | 5     | 180 494 412       | 180 578 405     | 5.076   | 3.86E-07 | CNOT6      |
| ENSG00000037280 | 5     | 180 601 506       | 180 649 624     | 5.083   | 3.72E-07 | FLT4       |
| ENSG00000131446 | 5     | 180 784 782       | 180 815 652     | 4.857   | 1.19E-06 | MGAT1      |
| ENSG00000278970 | 5     | 180 829 954       | 180 831 605     | 4.982   | 6.28E-07 | HEIH       |
| ENSG00000245060 | 5     | 180 830 957       | 180 835 726     | 4.996   | 5.84E-07 | LINC00847  |
| ENSG00000196670 | 5     | 180 847 611       | 180 861 285     | 5.206   | 1.93E-07 | ZFP62      |
| ENSG00000053328 | 6     | 110 245 928       | 110 358 272     | 4.832   | 1.35E-06 | METTL24    |
| ENSG00000203797 | 6     | 110 391 771       | 110 415 562     | 4.823   | 1.41E-06 | DDO        |
| ENSG00000010810 | 6     | 111 660 332       | 111 873 452     | 5.152   | 2.58E-07 | FYN        |
| ENSG00000074935 | 6     | 112 070 777       | 112 087 529     | 4.918   | 8.74E-07 | TUBE1      |
| ENSG00000203778 | 6     | 112 087 599       | 112 102 790     | 4.905   | 9.36E-07 | FAM229B    |
| ENSG00000112769 | 6     | 112 108 760       | 112 254 939     | 4.869   | 1.12E-06 | LAMA4      |
| ENSG00000112562 | 6     | 168 441 151       | 168 673 445     | 5.063   | 4.13E-07 | SMOC2      |

(Continued)

**Supplementary Table SIV Continued.**

| TargetID        | CHROM | Gene_Start (hg38) | Gene_End (hg38) | Zscore | Pvalue   | GeneName   |
|-----------------|-------|-------------------|-----------------|--------|----------|------------|
| ENSG00000184465 | 6     | 169 457 212       | 169 702 048     | 5.245  | 1.56E-07 | WDR27      |
| ENSG00000185127 | 6     | 169 702 190       | 169 704 856     | 5.357  | 8.48E-08 | C6orf120   |
| ENSG00000130024 | 6     | 169 703 905       | 169 725 566     | 5.356  | 8.49E-08 | PHF10      |
| ENSG00000184786 | 6     | 169 740 114       | 169 751 587     | 5.314  | 1.07E-07 | TCTE3      |
| ENSG00000130023 | 6     | 169 751 622       | 169 781 584     | 5.294  | 1.20E-07 | ERMARD     |
| ENSG00000071994 | 6     | 170 575 295       | 170 584 692     | 4.922  | 8.58E-07 | PDCD2      |
| ENSG00000050344 | 7     | 26 152 240        | 26 187 125      | 5.043  | 4.59E-07 | NFE2L3     |
| ENSG00000122566 | 7     | 26 189 927        | 26 201 529      | 4.849  | 1.24E-06 | HNRNPA2B1  |
| ENSG00000122565 | 7     | 26 201 162        | 26 213 356      | 4.869  | 1.12E-06 | CBX3       |
| ENSG00000086300 | 7     | 26 291 895        | 26 374 329      | 4.665  | 3.08E-06 | SNX10      |
| ENSG00000122779 | 7     | 138 460 334       | 138 589 993     | -6.357 | 2.06E-10 | TRIM24     |
| ENSG00000122778 | 7     | 138 831 381       | 138 981 318     | -5.882 | 4.07E-09 | KIAA1549   |
| ENSG00000146858 | 7     | 139 025 706       | 139 036 029     | -5.411 | 6.25E-08 | ZC3HAV1L   |
| ENSG00000105939 | 7     | 139 043 520       | 139 109 719     | -5.122 | 3.03E-07 | ZC3HAV1    |
| ENSG00000105948 | 7     | 139 133 744       | 139 191 986     | -5.057 | 4.26E-07 | TTC26      |
| ENSG00000157741 | 7     | 139 230 356       | 139 308 236     | -5.110 | 3.22E-07 | UBN2       |
| ENSG00000164898 | 7     | 139 339 457       | 139 346 319     | -5.071 | 3.95E-07 | FMC1       |
| ENSG00000146963 | 7     | 139 340 359       | 139 423 457     | -4.868 | 1.13E-06 | LUC7L2     |
| ENSG00000064393 | 7     | 139 561 570       | 139 777 778     | -4.896 | 9.78E-07 | HIPK2      |
| ENSG00000059377 | 7     | 139 777 051       | 140 020 325     | -4.820 | 1.44E-06 | TBXAS1     |
| ENSG00000059378 | 7     | 140 023 744       | 140 063 721     | -4.877 | 1.07E-06 | PARP12     |
| ENSG00000006459 | 7     | 140 084 746       | 140 177 035     | -4.932 | 8.16E-07 | KDM7A      |
| ENSG00000104626 | 8     | 9 002 147         | 9 116 746       | -4.765 | 1.89E-06 | ERI1       |
| ENSG00000173281 | 8     | 9 136 255         | 9 151 574       | -4.742 | 2.12E-06 | PPP1R3B    |
| ENSG00000269918 | 8     | 11 104 691        | 11 106 704      | 4.655  | 3.24E-06 | AF131215.6 |
| ENSG00000255310 | 8     | 11 107 788        | 11 109 726      | 4.661  | 3.15E-06 | AF131215.5 |
| ENSG00000175606 | 8     | 73 972 437        | 73 982 783      | -4.787 | 1.69E-06 | TMEM70     |
| ENSG00000253833 | 8     | 73 984 493        | 73 984 883      | -4.727 | 2.28E-06 | AC022868.1 |
| ENSG00000132554 | 8     | 99 960 936        | 100 131 268     | -4.665 | 3.09E-06 | RGS22      |
| ENSG00000147905 | 9     | 37 120 539        | 37 358 149      | -5.109 | 3.25E-07 | ZCCHC7     |
| ENSG00000137106 | 9     | 37 422 666        | 37 436 990      | -4.980 | 6.35E-07 | GRHPR      |
| ENSG00000078114 | 10    | 20 779 973        | 21 174 187      | -5.119 | 3.07E-07 | NEBL       |
| ENSG00000204682 | 10    | 21 492 658        | 21 497 262      | -5.172 | 2.31E-07 | CASC10     |
| ENSG00000180592 | 10    | 21 513 478        | 21 526 368      | -5.570 | 2.54E-08 | SKIDA1     |
| ENSG00000155287 | 10    | 99 610 522        | 99 620 609      | 5.338  | 9.42E-08 | SLC25A28   |
| ENSG00000198018 | 10    | 99 659 506        | 99 706 240      | 5.245  | 1.56E-07 | ENTPD7     |
| ENSG00000119929 | 10    | 99 702 558        | 99 756 134      | 4.938  | 7.90E-07 | CUTC       |
| ENSG00000014919 | 10    | 99 711 844        | 99 732 100      | 5.167  | 2.38E-07 | COX15      |
| ENSG00000166441 | 11    | 8 682 411         | 8 714 759       | -4.664 | 3.11E-06 | RPL27A     |
| ENSG00000212607 | 11    | 8 685 439         | 8 685 569       | -4.658 | 3.19E-06 | SNORA3B    |
| ENSG00000166444 | 11    | 8 693 351         | 8 910 951       | -4.699 | 2.62E-06 | ST5        |
| ENSG00000166452 | 11    | 8 911 139         | 8 920 084       | -4.990 | 6.04E-07 | AKIP1      |
| ENSG00000175348 | 11    | 8 947 294         | 8 965 011       | -5.060 | 4.19E-07 | TMEM9B     |
| ENSG00000254860 | 11    | 8 964 675         | 8 977 527       | -5.051 | 4.39E-07 | TMEM9B-AS1 |
| ENSG00000175352 | 11    | 8 980 576         | 9 004 049       | -5.045 | 4.54E-07 | NRIP3      |

(Continued)

**Supplementary Table SIV Continued.**

| TargetID        | CHROM | Gene_Start (hg38) | Gene_End (hg38) | Zscore | Pvalue   | GeneName   |
|-----------------|-------|-------------------|-----------------|--------|----------|------------|
| ENSG00000175356 | 11    | 9 020 391         | 9 138 114       | -5.121 | 3.03E-07 | SCUBE2     |
| ENSG00000184014 | 11    | 9 138 825         | 9 265 390       | -5.371 | 7.83E-08 | DENND5A    |
| ENSG00000166471 | 11    | 9 280 654         | 9 314 780       | -5.457 | 4.84E-08 | TMEM41B    |
| ENSG00000205339 | 11    | 9 384 622         | 9 448 126       | -5.402 | 6.58E-08 | IPO7       |
| ENSG00000201998 | 11    | 9 428 773         | 9 428 954       | -5.193 | 2.07E-07 | SNORA23    |
| ENSG00000268403 | 11    | 9 459 556         | 9 460 702       | -5.132 | 2.86E-07 | AC132192.2 |
| ENSG00000166478 | 11    | 9 460 319         | 9 528 524       | -5.138 | 2.78E-07 | ZNF143     |
| ENSG00000226210 | 12    | 14 522            | 32 015          | 4.668  | 3.03E-06 | AC215219.1 |
| ENSG00000120645 | 12    | 66 765            | 178 460         | 5.110  | 3.22E-07 | IQSEC3     |
| ENSG00000111181 | 12    | 190 077           | 214 570         | 5.182  | 2.19E-07 | SLC6A12    |
| ENSG00000261799 | 12    | 273 954           | 277 123         | 5.289  | 1.23E-07 | AC007406.5 |
| ENSG00000073614 | 12    | 280 129           | 389 454         | 5.509  | 3.60E-08 | KDM5A      |
| ENSG00000120647 | 12    | 389 273           | 442 645         | 5.513  | 3.52E-08 | CCDC77     |
| ENSG00000139044 | 12    | 460 364           | 563 509         | 5.462  | 4.72E-08 | B4GALNT3   |
| ENSG00000171840 | 12    | 564 296           | 663 779         | 5.436  | 5.44E-08 | NINJ2      |
| ENSG00000177406 | 12    | 630 891           | 663 706         | 5.436  | 5.44E-08 | AC021054.1 |
| ENSG00000171681 | 12    | 14 365 632        | 14 502 935      | -6.418 | 1.38E-10 | ATF7IP     |
| ENSG00000121316 | 12    | 14 503 661        | 14 568 349      | -6.592 | 4.34E-11 | PLBD1      |
| ENSG00000261324 | 12    | 14 762 504        | 14 767 931      | -6.659 | 2.77E-11 | AC010168.2 |
| ENSG00000197837 | 12    | 14 767 999        | 14 771 131      | -6.658 | 2.77E-11 | HIST4H4    |
| ENSG00000246705 | 12    | 14 774 383        | 14 778 002      | -6.633 | 3.29E-11 | H2AFJ      |
| ENSG00000084463 | 12    | 14 784 579        | 14 803 540      | -6.590 | 4.40E-11 | WBPI1      |
| ENSG00000182993 | 12    | 14 803 572        | 14 906 586      | -6.648 | 2.98E-11 | C12orf60   |
| ENSG00000111341 | 12    | 14 881 181        | 14 885 926      | -7.276 | 3.44E-13 | MGP        |
| ENSG00000139055 | 12    | 14 914 035        | 14 939 082      | -7.483 | 7.27E-14 | ERP27      |
| ENSG00000111348 | 12    | 14 942 017        | 14 961 728      | -7.355 | 1.92E-13 | ARHGDI B   |
| ENSG00000134533 | 12    | 15 107 783        | 15 348 675      | -6.378 | 1.79E-10 | RERG       |
| ENSG00000151490 | 12    | 15 322 397        | 15 597 399      | -5.385 | 7.24E-08 | PTPRO      |
| ENSG00000139163 | 12    | 22 625 075        | 22 690 665      | 4.741  | 2.12E-06 | ETNK1      |
| ENSG00000257599 | 12    | 29 389 289        | 29 487 488      | -5.910 | 3.42E-09 | OVCH1-AS1  |
| ENSG00000133687 | 12    | 29 500 840        | 29 784 759      | -6.883 | 5.85E-12 | TMTC1      |
| ENSG00000136040 | 12    | 94 148 723        | 94 307 675      | -8.341 | 1.11E-16 | PLXNC1     |
| ENSG00000173588 | 12    | 94 306 449        | 94 459 988      | -9.099 | 0        | CEP83      |
| ENSG00000213250 | 12    | 94 423 744        | 94 424 969      | -8.921 | 0        | RBMS2P1    |
| ENSG00000278916 | 12    | 94 460 003        | 94 462 484      | -8.920 | 0        | CEP83-AS1  |
| ENSG00000057704 | 12    | 94 567 124        | 94 650 562      | -8.222 | 2.22E-16 | TMCC3      |
| ENSG00000184752 | 12    | 94 897 055        | 95 003 770      | -8.462 | 0        | NDUFA12    |
| ENSG00000120798 | 12    | 95 020 229        | 95 073 703      | -8.501 | 0        | NR2C1      |
| ENSG00000180263 | 12    | 95 076 749        | 95 217 482      | -8.440 | 0        | FGD6       |
| ENSG0000028203  | 12    | 95 217 746        | 95 302 790      | -8.185 | 2.22E-16 | VEZT       |
| ENSG00000241556 | 12    | 95 467 397        | 95 467 861      | -8.390 | 0        | AC018475.1 |
| ENSG00000111142 | 12    | 95 473 520        | 95 515 839      | -8.395 | 0        | METAP2     |
| ENSG00000136014 | 12    | 95 516 560        | 95 551 490      | -8.438 | 0        | USP44      |
| ENSG00000074527 | 12    | 95 657 807        | 95 791 152      | -8.712 | 0        | NTN4       |
| ENSG00000139343 | 12    | 95 858 928        | 95 903 828      | -8.786 | 0        | SNRPF      |

(Continued)

**Supplementary Table SIV Continued.**

| TargetID        | CHROM | Gene_Start (hg38) | Gene_End (hg38) | Zscore | Pvalue   | GeneName        |
|-----------------|-------|-------------------|-----------------|--------|----------|-----------------|
| ENSG00000084110 | 12    | 95 972 662        | 95 996 365      | -9.254 | 0        | HAL             |
| ENSG00000111144 | 12    | 96 000 828        | 96 043 520      | -9.424 | 0        | LTA4H           |
| ENSG00000111145 | 12    | 96 194 382        | 96 269 835      | -8.772 | 0        | ELK3            |
| ENSG00000059758 | 12    | 96 278 261        | 96 400 560      | -5.917 | 3.29E-09 | CDK17           |
| ENSG00000102699 | 13    | 24 420 926        | 24 512 810      | 4.862  | 1.16E-06 | PARP4           |
| ENSG00000100592 | 14    | 59 188 646        | 59 371 405      | 4.872  | 1.10E-06 | DAAMI           |
| ENSG00000181619 | 14    | 59 429 022        | 59 465 342      | 4.772  | 1.82E-06 | GPRI35          |
| ENSG00000126790 | 14    | 59 460 363        | 59 484 430      | 4.747  | 2.06E-06 | L3HYPDH         |
| ENSG00000050130 | 14    | 59 484 443        | 59 505 410      | 4.748  | 2.06E-06 | JKAMP           |
| ENSG00000021645 | 14    | 78 170 373        | 79 868 290      | 5.873  | 4.27E-09 | NRXN3           |
| ENSG00000185739 | 16    | 4 189 374         | 4 242 080       | -4.848 | 1.25E-06 | SRL             |
| ENSG00000103381 | 16    | 12 659 799        | 12 804 017      | 5.682  | 1.33E-08 | CPPED1          |
| ENSG00000171241 | 16    | 46 580 554        | 46 621 626      | -5.006 | 5.57E-07 | SHCBP1          |
| ENSG00000261512 | 16    | 46 622 861        | 46 624 451      | -5.006 | 5.57E-07 | AC092368.3      |
| ENSG00000259856 | 16    | 46 626 404        | 46 626 992      | -5.006 | 5.57E-07 | RAB43P1         |
| ENSG00000069329 | 16    | 46 656 132        | 46 689 518      | -5.006 | 5.57E-07 | VPS35           |
| ENSG00000091651 | 16    | 46 689 643        | 46 698 394      | -5.005 | 5.58E-07 | ORC6            |
| ENSG00000140795 | 16    | 46 703 369        | 46 790 407      | -5.003 | 5.63E-07 | MYLK3           |
| ENSG00000155330 | 16    | 46 796 607        | 46 831 411      | -5.003 | 5.63E-07 | C16orf87        |
| ENSG00000166123 | 16    | 46 884 378        | 46 931 297      | -5.003 | 5.63E-07 | GPT2            |
| ENSG00000069345 | 16    | 46 955 362        | 46 973 788      | -5.003 | 5.63E-07 | DNAJA2          |
| ENSG00000171208 | 16    | 47 077 703        | 47 143 997      | -5.002 | 5.66E-07 | NETO2           |
| ENSG00000129636 | 16    | 47 154 387        | 47 464 149      | -4.958 | 7.14E-07 | ITFG1           |
| ENSG00000102893 | 16    | 47 461 123        | 47 701 523      | -4.932 | 8.15E-07 | PHKB            |
| ENSG00000185722 | 17    | 4 163 907         | 4 263 977       | -4.683 | 2.83E-06 | ANKFY1          |
| ENSG00000132388 | 17    | 4 269 259         | 4 366 628       | -4.733 | 2.21E-06 | UBE2G1          |
| ENSG00000215067 | 17    | 6 876 635         | 7 012 349       | -4.914 | 8.93E-07 | ALOX12-AS1      |
| ENSG00000219200 | 17    | 7 012 417         | 7 014 532       | -4.708 | 2.51E-06 | RNASEK          |
| ENSG00000161939 | 17    | 7 012 635         | 7 017 520       | -4.730 | 2.25E-06 | RNASEK-C17orf49 |
| ENSG00000258315 | 17    | 7 014 495         | 7 017 525       | -4.732 | 2.22E-06 | C17orf49        |
| ENSG00000267532 | 17    | 7 015 818         | 7 019 659       | -4.746 | 2.07E-06 | MIR497HG        |
| ENSG00000161940 | 17    | 7 023 020         | 7 030 290       | -4.819 | 1.44E-06 | BCL6B           |
| ENSG00000174327 | 17    | 7 036 075         | 7 040 121       | -4.977 | 6.47E-07 | SLC16A13        |
| ENSG00000132514 | 17    | 7 074 537         | 7 080 307       | -5.108 | 3.25E-07 | CLEC10A         |
| ENSG00000141505 | 17    | 7 173 431         | 7 179 564       | -4.939 | 7.83E-07 | ASGRI           |
| ENSG00000132535 | 17    | 7 189 890         | 7 219 702       | -4.880 | 1.06E-06 | DLG4            |
| ENSG00000072778 | 17    | 7 217 125         | 7 225 273       | -4.899 | 9.65E-07 | ACADVL          |
| ENSG00000004975 | 17    | 7 225 341         | 7 234 545       | -4.963 | 6.94E-07 | DVL2            |
| ENSG00000040633 | 17    | 7 235 028         | 7 239 722       | -5.117 | 3.11E-07 | PHF23           |
| ENSG00000170296 | 17    | 7 240 014         | 7 242 770       | -5.160 | 2.48E-07 | GABARAP         |
| ENSG00000262526 | 17    | 7 240 427         | 7 244 635       | -5.160 | 2.48E-07 | AC120057.3      |
| ENSG00000175826 | 17    | 7 243 591         | 7 252 491       | -5.170 | 2.34E-07 | CTDNEP1         |
| ENSG00000170291 | 17    | 7 251 416         | 7 259 940       | -5.189 | 2.11E-07 | ELP5            |
| ENSG00000181885 | 17    | 7 259 903         | 7 263 983       | -5.175 | 2.28E-07 | CLDN7           |

(Continued)

**Supplementary Table SIV Continued.**

| TargetID        | CHROM | Gene_Start (hg38) | Gene_End (hg38) | Zscore | Pvalue   | GeneName    |
|-----------------|-------|-------------------|-----------------|--------|----------|-------------|
| ENSG00000132507 | 17    | 7306999           | 7312463         | -5.223 | 1.76E-07 | EIF5A       |
| ENSG00000132522 | 17    | 7311324           | 7315564         | -5.224 | 1.75E-07 | GPS2        |
| ENSG00000215041 | 17    | 7315628           | 7329393         | -5.224 | 1.75E-07 | NEURL4      |
| ENSG00000072818 | 17    | 7336529           | 7351478         | -5.247 | 1.55E-07 | ACAP1       |
| ENSG00000213859 | 17    | 7351889           | 7354944         | -5.226 | 1.73E-07 | KCTD11      |
| ENSG00000174292 | 17    | 7380534           | 7389774         | -5.225 | 1.74E-07 | TNK1        |
| ENSG00000187838 | 17    | 7389727           | 7394843         | -5.153 | 2.57E-07 | PLSCR3      |
| ENSG00000205544 | 17    | 7402975           | 7404137         | -5.053 | 4.35E-07 | TMEM256     |
| ENSG00000169992 | 17    | 7404874           | 7419860         | -5.032 | 4.86E-07 | NLGN2       |
| ENSG00000181284 | 17    | 7435443           | 7437679         | -4.893 | 9.94E-07 | TMEM102     |
| ENSG00000170175 | 17    | 7445061           | 7457707         | -4.882 | 1.05E-06 | CHRNBI      |
| ENSG00000174282 | 17    | 7459366           | 7484263         | -4.894 | 9.86E-07 | ZBTB4       |
| ENSG00000181222 | 17    | 7484366           | 7514616         | -5.025 | 5.03E-07 | POLR2A      |
| ENSG00000239697 | 17    | 7548891           | 7557890         | -5.109 | 3.23E-07 | TNFSF12     |
| ENSG00000161955 | 17    | 7558292           | 7561608         | -5.091 | 3.56E-07 | TNFSF13     |
| ENSG00000161956 | 17    | 7561875           | 7571969         | -5.080 | 3.78E-07 | SEN3        |
| ENSG00000277957 | 17    | 7563287           | 7578715         | -5.082 | 3.74E-07 | SEN3-EIF4A1 |
| ENSG00000161960 | 17    | 7572706           | 7579005         | -5.102 | 3.37E-07 | EIF4A1      |
| ENSG00000264772 | 17    | 7572826           | 7582024         | -5.103 | 3.35E-07 | AC016876.2  |
| ENSG00000209582 | 17    | 7574713           | 7574847         | -5.101 | 3.38E-07 | SNORA48     |
| ENSG00000238917 | 17    | 7576811           | 7576952         | -5.141 | 2.73E-07 | SNORD10     |
| ENSG00000277985 | 17    | 7577955           | 7578091         | -5.146 | 2.67E-07 | SNORA67     |
| ENSG00000129226 | 17    | 7579467           | 7582113         | -5.168 | 2.37E-07 | CD68        |
| ENSG00000233223 | 17    | 7581964           | 7584072         | -5.229 | 1.70E-07 | AC016876.1  |
| ENSG00000129255 | 17    | 7583529           | 7592789         | -5.253 | 1.49E-07 | MPDU1       |
| ENSG00000129245 | 17    | 7591230           | 7614871         | -5.301 | 1.15E-07 | FXR2        |
| ENSG00000141504 | 17    | 7626234           | 7627876         | -5.523 | 3.34E-08 | SAT2        |
| ENSG00000129244 | 17    | 7646627           | 7657768         | -5.717 | 1.08E-08 | ATP1B2      |
| ENSG00000141510 | 17    | 7661779           | 7687550         | -5.838 | 5.27E-09 | TP53        |
| ENSG00000262251 | 17    | 7685260           | 7686371         | -5.841 | 5.18E-09 | AC087388.1  |
| ENSG00000141499 | 17    | 7686071           | 7703502         | -5.825 | 5.72E-09 | WRAP53      |
| ENSG00000108947 | 17    | 7705202           | 7711378         | -5.883 | 4.03E-09 | EFNB3       |
| ENSG00000183914 | 17    | 7717354           | 7833744         | -5.974 | 2.32E-09 | DNAH2       |
| ENSG00000132510 | 17    | 7839904           | 7854796         | -5.894 | 3.76E-09 | KDM6B       |
| ENSG00000167874 | 17    | 7855065           | 7856099         | -5.902 | 3.60E-09 | TMEM88      |
| ENSG00000183011 | 17    | 7856685           | 7885238         | -5.895 | 3.74E-09 | NAA38       |
| ENSG00000182224 | 17    | 7857746           | 7862282         | -5.883 | 4.03E-09 | CYB5D1      |
| ENSG00000280046 | 17    | 7858943           | 7866083         | -5.883 | 4.02E-09 | AC104581.4  |
| ENSG00000170004 | 17    | 7884806           | 7912760         | -5.859 | 4.66E-09 | CHD3        |
| ENSG00000252835 | 17    | 7906122           | 7906260         | -5.867 | 4.43E-09 | SCARNA21    |
| ENSG00000179859 | 17    | 7913324           | 7916276         | -5.888 | 3.90E-09 | LINC02581   |
| ENSG00000170049 | 17    | 7921859           | 7929803         | -5.887 | 3.94E-09 | KCNAB3      |
| ENSG00000170043 | 17    | 7930345           | 7932123         | -5.903 | 3.57E-09 | TRAPPC1     |
| ENSG00000170037 | 17    | 7932101           | 7949918         | -5.911 | 3.40E-09 | CNTROB      |

(Continued)

**Supplementary Table SIV Continued.**

| TargetID        | CHROM | Gene_Start (hg38) | Gene_End (hg38) | Zscore | Pvalue   | GeneName   |
|-----------------|-------|-------------------|-----------------|--------|----------|------------|
| ENSG00000179094 | 17    | 8 140 472         | 8 156 506       | -5.528 | 3.24E-08 | PER1       |
| ENSG00000220205 | 17    | 8 159 149         | 8 163 546       | -5.532 | 3.16E-08 | VAMP2      |
| ENSG00000179029 | 17    | 8 173 237         | 8 176 399       | -5.544 | 2.96E-08 | TMEM107    |
| ENSG00000196544 | 17    | 8 188 333         | 8 190 907       | -5.551 | 2.83E-08 | BORCS6     |
| ENSG00000178999 | 17    | 8 204 733         | 8 210 600       | -5.508 | 3.62E-08 | AURKB      |
| ENSG00000178977 | 17    | 8 220 642         | 8 224 043       | -5.438 | 5.40E-08 | LINC00324  |
| ENSG00000178971 | 17    | 8 224 821         | 8 248 044       | -5.414 | 6.15E-08 | CTCI       |
| ENSG00000178921 | 17    | 8 247 618         | 8 270 491       | -5.343 | 9.16E-08 | PFAS       |
| ENSG00000125434 | 17    | 8 287 763         | 8 295 343       | -5.060 | 4.19E-07 | SLC25A35   |
| ENSG00000108961 | 17    | 8 288 497         | 8 290 092       | -5.061 | 4.17E-07 | RANGRF     |
| ENSG00000198844 | 17    | 8 310 241         | 8 322 516       | -5.010 | 5.44E-07 | ARHGEF15   |
| ENSG00000184619 | 17    | 8 368 637         | 8 376 711       | -4.772 | 1.82E-06 | KRBA2      |
| ENSG00000263809 | 17    | 8 368 638         | 8 383 187       | -4.772 | 1.82E-06 | AC135178.2 |
| ENSG00000161970 | 17    | 8 377 520         | 8 383 213       | -4.728 | 2.27E-06 | RPL26      |
| ENSG00000108821 | 17    | 50 183 289        | 50 201 632      | -5.587 | 2.32E-08 | COL1A1     |
| ENSG00000167105 | 17    | 50 271 406        | 50 281 485      | -5.402 | 6.60E-08 | TMEM92     |
| ENSG00000015532 | 17    | 50 346 092        | 50 363 138      | -4.941 | 7.77E-07 | XYLT2      |
| ENSG00000279792 | 17    | 50 362 967        | 50 365 232      | -4.948 | 7.48E-07 | AC015909.5 |
| ENSG00000108826 | 17    | 50 367 857        | 50 373 214      | -4.770 | 1.84E-06 | MRPL27     |
| ENSG00000067900 | 18    | 20 946 906        | 21 111 851      | -5.485 | 4.13E-08 | ROCK1      |
| ENSG00000141449 | 18    | 21 242 242        | 21 525 417      | -4.750 | 2.03E-06 | GREB1L     |
| ENSG00000089063 | 20    | 5 068 232         | 5 113 103       | -4.730 | 2.24E-06 | TMEM230    |
| ENSG00000183765 | 22    | 28 687 743        | 28 742 422      | 5.060  | 4.19E-07 | CHEK2      |
| ENSG00000100209 | 22    | 28 742 031        | 28 757 515      | 5.220  | 1.79E-07 | HSCB       |
| ENSG00000159873 | 22    | 28 772 674        | 28 789 301      | 5.215  | 1.83E-07 | CCDC117    |
| ENSG00000100219 | 22    | 28 794 555        | 28 800 597      | 5.180  | 2.22E-07 | XBPI       |
| ENSG00000226471 | 22    | 28 800 683        | 28 848 559      | 5.191  | 2.09E-07 | Z93930.2   |
| ENSG00000183579 | 22    | 28 883 592        | 29 057 487      | 5.259  | 1.44E-07 | ZNRF3      |
| ENSG00000100380 | 22    | 40 824 535        | 40 857 022      | -4.798 | 1.61E-06 | STI3       |
| ENSG00000196236 | 22    | 40 857 077        | 40 932 815      | -4.909 | 9.15E-07 | XPINPEP3   |
| ENSG00000100387 | 22    | 40 951 347        | 40 973 309      | -5.119 | 3.07E-07 | RBX1       |
| ENSG00000100393 | 22    | 41 091 786        | 41 180 079      | -5.798 | 6.70E-09 | EP300      |
| ENSG00000100395 | 22    | 41 205 205        | 41 231 271      | -5.254 | 1.49E-07 | L3MBTL2    |
| ENSG00000100399 | 22    | 41 229 510        | 41 240 934      | -4.889 | 1.01E-06 | CHADL      |
