# Supplementary material for: Tissue specific regulation of transcription in endometrium and association with disease
Source: PubMed Central journal article supplement — Hum Reprod. 2020 Feb 26;35(2):377–93. doi: 10.1093/humrep/dez279 (PMC7048713; doi:10.1093/humrep/dez279), 2020-02-26
Supplement: suppt5_dez279.pdf [file suppt5_dez279.pdf]

**Supplementary Table SV** SNPs associated with traits in the GWAS Catalog with *cis*-eQTLs in endometrium.

| PUBMEDID   | DISEASE.TRAIT                                                                 | CHR_ID | CHR_POS     | SNPS       | P.VALUE   |
|------------|-------------------------------------------------------------------------------|--------|-------------|------------|-----------|
| 21 801 394 | Drug-induced Stevens-Johnson syndrome or toxic epidermal necrolysis (SJS/TEN) | 6      | 31 440 051  | rs9469003  | 2.00E-09  |
| 21 804 548 | Asthma                                                                        | 6      | 32 390 736  | rs3117098  | 5.00E-12  |
| 21 804 548 | Asthma                                                                        | 12     | 55 970 537  | rs2069408  | 1.00E-10  |
| 21 804 548 | Asthma                                                                        | 12     | 56 018 703  | rs1701704  | 2.00E-13  |
| 21 841 780 | Graves' disease                                                               | 6      | 32 696 074  | rs6457617  | 7.00E-33  |
| 21 900 946 | Graves' disease                                                               | 6      | 29 967 473  | rs3893464  | 2.00E-20  |
| 21 909 109 | Metabolite levels                                                             | 9      | 133 278 431 | rs651007   | 6.00E-09  |
| 21 946 350 | Pulmonary function                                                            | 16     | 75 356 418  | rs2865531  | 2.00E-11  |
| 22 001 757 | Liver enzyme levels (alkaline phosphatase)                                    | 1      | 21 439 960  | rs1976403  | 2.00E-50  |
| 22 001 757 | Liver enzyme levels (alkaline phosphatase)                                    | 9      | 133 278 724 | rs579459   | 3.00E-123 |
| 22 001 757 | Liver enzyme levels (gamma-glutamyl transferase)                              | 22     | 23 953 099  | rs2739330  | 2.00E-09  |
| 22 075 330 | IgE levels                                                                    | 6      | 29 956 061  | rs2571391  | 1.00E-15  |
| 20 686 565 | LDL cholesterol                                                               | 9      | 133 279 427 | rs635634   | 8.00E-22  |
| 20 686 565 | Triglycerides                                                                 | 6      | 31 297 713  | rs2247056  | 2.00E-15  |
| 20 686 565 | Cholesterol, total                                                            | 9      | 133 279 427 | rs635634   | 9.00E-21  |
| 20 686 565 | Cholesterol, total                                                            | 20     | 35 564 866  | rs2277862  | 4.00E-10  |
| 22 190 364 | Multiple sclerosis                                                            | 6      | 32 445 768  | rs3129889  | 1.00E-206 |
| 20 596 022 | Alopecia areata                                                               | 12     | 56 018 703  | rs1701704  | 3.00E-08  |
| 20 596 022 | Alopecia areata                                                               | 6      | 32 711 222  | rs9275572  | 1.00E-35  |
| 20 558 539 | Phosphorus levels                                                             | 1      | 21 496 799  | rs1697421  | 1.00E-27  |
| 20 694 011 | Immunoglobulin A                                                              | 6      | 32 619 077  | rs9271366  | 3.00E-33  |
| 20 045 101 | CD4:CD8 lymphocyte ratio                                                      | 6      | 31 284 619  | rs2524054  | 2.00E-28  |
| 20 045 101 | CD4:CD8 lymphocyte ratio                                                      | 6      | 31 284 619  | rs2524054  | 6.00E-21  |
| 20 694 011 | Immunoglobulin A                                                              | 6      | 32 638 107  | rs2187668  | 2.00E-33  |
| 21 037 568 | Hodgkin's lymphoma                                                            | 6      | 32 460 508  | rs6903608  | 3.00E-50  |
| 21 060 863 | Retinal vascular caliber                                                      | 19     | 48 725 015  | rs2287921  | 2.00E-25  |
| 21 044 948 | Parkinson's disease                                                           | 17     | 46 003 698  | rs8070723  | 7.00E-12  |
| 21 051 598 | HIV-1 control                                                                 | 6      | 31 306 603  | rs9264942  | 3.00E-35  |
| 21 051 598 | HIV-1 control                                                                 | 6      | 31 359 287  | rs2523590  | 2.00E-13  |
| 19 744 961 | Folate pathway vitamin levels                                                 | 1      | 21 459 575  | rs4654748  | 4.00E-11  |
| 20 953 190 | Psoriasis                                                                     | 6      | 111 352 511 | rs240993   | 5.00E-20  |
| 21 298 027 | Crohn's disease and celiac disease                                            | 2      | 60 990 407  | rs10188217 | 1.00E-11  |
| 21 292 315 | Parkinson's disease                                                           | 17     | 45 637 484  | rs2942168  | 1.00E-28  |
| 18 385 676 | Lung cancer                                                                   | 15     | 78 513 681  | rs8034191  | 3.00E-18  |
| 18 385 738 | Lung cancer                                                                   | 15     | 78 513 681  | rs8034191  | 5.00E-20  |
| 18 385 739 | Nicotine dependence                                                           | 15     | 78 601 997  | rs1051730  | 6.00E-20  |
| 18 198 356 | Type 1 diabetes                                                               | 12     | 56 018 703  | rs1701704  | 9.00E-10  |
| 17 804 836 | Rheumatoid arthritis                                                          | 9      | 120 927 961 | rs3761847  | 4.00E-14  |
| 17 554 300 | Type 1 diabetes                                                               | 12     | 56 076 841  | rs11171739 | 1.00E-11  |
| 17 554 260 | Type 1 diabetes                                                               | 12     | 56 088 396  | rs2292239  | 2.00E-20  |

(Continued)

**Supplementary Table SV Continued.**

| <b>PUBMEDID</b> | <b>DISEASE.TRAIT</b>                                                   | <b>CHR_ID</b> | <b>CHR_POS</b> | <b>SNPS</b> | <b>P.VALUE</b> |
|-----------------|------------------------------------------------------------------------|---------------|----------------|-------------|----------------|
| 18668548        | Rheumatoid arthritis                                                   | 6             | 32696074       | rs6457617   | 1.00E-09       |
| 17554300        | Rheumatoid arthritis                                                   | 6             | 32696074       | rs6457617   | 5.00E-75       |
| 18204098        | Systemic lupus erythematosus                                           | 6             | 32638107       | rs2187668   | 3.00E-21       |
| 18780872        | Lung cancer                                                            | 15            | 78513681       | rs8034191   | 1.00E-08       |
| 18794853        | Rheumatoid arthritis                                                   | 6             | 32696222       | rs6457620   | 4.00E-186      |
| 18836448        | Ulcerative colitis                                                     | 6             | 32463370       | rs9268877   | 6.00E-18       |
| 18940312        | Liver enzyme levels                                                    | 1             | 21495264       | rs1780324   | 7.00E-15       |
| 18978792        | Type I diabetes                                                        | 6             | 32636595       | rs9272346   | 6.00E-129      |
| 18978792        | Type I diabetes                                                        | 12            | 56088396       | rs2292239   | 3.00E-16       |
| 18978790        | Lung cancer                                                            | 15            | 78601997       | rs1051730   | 1.00E-15       |
| 22197929        | IgA nephropathy                                                        | 6             | 29974166       | rs2523946   | 2.00E-11       |
| 21886157        | Metabolic traits                                                       | 1             | 21494497       | rs10799701  | 3.00E-20       |
| 21931564        | Metabolite levels                                                      | 10            | 98397096       | rs7072216   | 8.00E-15       |
| 22286212        | Hodgkin's lymphoma                                                     | 6             | 32465390       | rs2395185   | 4.00E-31       |
| 22367966        | Vitamin B12 levels                                                     | 13            | 99866380       | rs41281112  | 9.00E-10       |
| 22396660        | Nephrolithiasis                                                        | 5             | 177371305      | rs11746443  | 9.00E-12       |
| 22451204        | Parkinson's disease                                                    | 17            | 46779275       | rs199515    | 3.00E-17       |
| 22504418        | Intracranial volume                                                    | 17            | 46109891       | rs9303525   | 8.00E-15       |
| 17554300        | Type I diabetes                                                        | 6             | 32636595       | rs9272346   | 5.00E-134      |
| 17558408        | Celiac disease                                                         | 6             | 32638107       | rs2187668   | 1.00E-19       |
| 17632545        | Type I diabetes                                                        | 6             | 32700133       | rs2647044   | 1.00E-16       |
| 17660530        | Multiple sclerosis                                                     | 6             | 32445274       | rs3135388   | 9.00E-81       |
| 18758464        | Inflammatory bowel disease                                             | 6             | 32601914       | rs477515    | 1.00E-08       |
| 22561518        | Vitiligo                                                               | 12            | 56023144       | rs2456973   | 3.00E-14       |
| 23420232        | Chronic hepatitis C infection                                          | 6             | 32710820       | rs4273729   | 5.00E-17       |
| 23511034        | Ulcerative colitis                                                     | 6             | 32619077       | rs9271366   | 1.00E-18       |
| 23544013        | Ovarian cancer in BRCA1 mutation carriers                              | 17            | 45439036       | rs17631303  | 1.00E-08       |
| 23544013        | Ovarian cancer in BRCA1 mutation carriers                              | 17            | 46710944       | rs183211    | 3.00E-08       |
| 23544013        | Ovarian cancer in BRCA1 mutation carriers                              | 17            | 45439036       | rs17631303  | 1.00E-08       |
| 23544013        | Ovarian cancer in BRCA1 mutation carriers                              | 17            | 46710944       | rs183211    | 3.00E-08       |
| 21738480        | White blood cell count                                                 | 6             | 31274397       | rs2524079   | 1.00E-11       |
| 23817571        | Allergic sensitization                                                 | 6             | 32658534       | rs6906021   | 2.00E-12       |
| 23817571        | Allergic sensitization                                                 | 6             | 31386405       | rs6932730   | 4.00E-08       |
| 23817569        | Self-reported allergy                                                  | 6             | 32658534       | rs6906021   | 7.00E-15       |
| 23824729        | Homocysteine levels                                                    | 1             | 45513003       | rs4660306   | 2.00E-09       |
| 25343990        | Blood and toenail selenium levels                                      | 5             | 79129365       | rs558133    | 6.00E-11       |
| 25352340        | Iron status biomarkers (ferritin levels)                               | 9             | 133278431      | rs651007    | 1.00E-08       |
| 25101718        | Pulmonary artery enlargement and chronic obstructive pulmonary disease | 15            | 78575140       | rs17486278  | 7.00E-10       |
| 21323541        | Idiopathic membranous nephropathy                                      | 6             | 32638107       | rs2187668   | 8.00E-93       |
| 21323541        | Idiopathic membranous nephropathy                                      | 6             | 31133897       | rs3130564   | 1.00E-42       |
| 19122664        | Ulcerative colitis                                                     | 6             | 32465390       | rs2395185   | 1.00E-16       |
| 19198609        | Myocardial infarction (early onset)                                    | 1             | 222650187      | rs17465637  | 1.00E-09       |
| 19300482        | Chronic obstructive pulmonary disease                                  | 15            | 78513681       | rs8034191   | 1.00E-10       |
| 19303062        | Folate pathway vitamin levels                                          | 1             | 21459575       | rs4654748   | 8.00E-18       |

(Continued)

**Supplementary Table SV Continued.**

| <b>PUBMEDID</b> | <b>DISEASE.TRAIT</b>                                   | <b>CHR_ID</b> | <b>CHR_POS</b> | <b>SNPS</b> | <b>P.VALUE</b> |
|-----------------|--------------------------------------------------------|---------------|----------------|-------------|----------------|
| 19 430 480      | Type I diabetes                                        | 12            | 56 088 396     | rs2292239   | 2.00E-25       |
| 19 430 480      | Type I diabetes                                        | 17            | 40 614 034     | rs7221109   | 1.00E-09       |
| 19 430 482      | Renal function and chronic kidney disease              | 15            | 45 406 595     | rs2467853   | 6.00E-14       |
| 19 503 088      | Rheumatoid arthritis                                   | 9             | 120 890 620    | rs881375    | 4.00E-08       |
| 19 525 955      | Multiple sclerosis                                     | 6             | 32 619 077     | rs9271366   | 7.00E-184      |
| 19 525 953      | Multiple sclerosis                                     | 6             | 32 445 274     | rs3135388   | 4.00E-225      |
| 19 525 953      | Multiple sclerosis                                     | 6             | 29 737 882     | rs2523393   | 1.00E-17       |
| 19 664 746      | Nasopharyngeal carcinoma                               | 6             | 29 950 322     | rs2517713   | 4.00E-20       |
| 19 654 303      | Lung cancer                                            | 15            | 78 513 681     | rs8034191   | 3.00E-26       |
| 19 729 612      | Soluble E-selectin levels                              | 9             | 133 278 724    | rs579459    | 1.00E-29       |
| 19 801 982      | Bone mineral density (spine)                           | 17            | 45 727 828     | rs9303521   | 1.00E-08       |
| 21 383 967      | Celiac disease or Rheumatoid arthritis                 | 9             | 120 878 222    | rs1953126   | 4.00E-11       |
| 21 378 990      | Coronary heart disease                                 | 9             | 133 278 724    | rs579459    | 4.00E-14       |
| 21 297 633      | Ulcerative colitis                                     | 2             | 60 977 721     | rs7608910   | 2.00E-14       |
| 21 297 633      | Ulcerative colitis                                     | 6             | 32 461 866     | rs9268853   | 1.00E-55       |
| 21 297 633      | Ulcerative colitis                                     | 2             | 218 145 423    | rs11676348  | 1.00E-10       |
| 21 408 207      | Systemic lupus erythematosus                           | 6             | 32 638 107     | rs2187668   | 6.00E-28       |
| 21 378 990      | Coronary heart disease                                 | 1             | 222 650 187    | rs17465637  | 1.00E-08       |
| 21 399 633      | Nephropathy                                            | 6             | 32 713 854     | rs9275596   | 2.00E-26       |
| 21 499 248      | Hepatocellular carcinoma                               | 6             | 32 711 222     | rs9275572   | 6.00E-09       |
| 21 499 248      | Hepatocellular carcinoma                               | 6             | 31 398 818     | rs2596542   | 4.00E-13       |
| 21 533 074      | Follicular lymphoma                                    | 6             | 32 696 681     | rs2647012   | 2.00E-21       |
| 21 570 397      | Drug-induced liver injury (amoxicillin-clavulanate)    | 6             | 29 860 883     | rs2523822   | 2.00E-10       |
| 21 623 375      | Paget's disease                                        | 7             | 135 608 380    | rs4294134   | 8.00E-10       |
| 21 685 912      | Progressive supranuclear palsy                         | 17            | 46 003 698     | rs8070723   | 2.00E-118      |
| 21 699 788      | Ulcerative colitis or Crohn's disease                  | 6             | 32 619 077     | rs9271366   | 2.00E-70       |
| 21 738 487      | Parkinson's disease                                    | 17            | 45 846 317     | rs12185268  | 3.00E-14       |
| 21 750 679      | Systemic sclerosis                                     | 6             | 32 696 074     | rs6457617   | 2.00E-37       |
| 24 651 765      | Plasma homocysteine levels (post-methionine load test) | 6             | 42 958 065     | rs9296404   | 2.00E-63       |
| 24 768 677      | Autoimmune hepatitis type- I                           | 6             | 32 638 107     | rs2187668   | 2.00E-78       |
| 24 390 342      | Rheumatoid arthritis                                   | 12            | 56 001 170     | rs773125    | 1.00E-10       |
| 24 390 342      | Rheumatoid arthritis                                   | 12            | 56 001 170     | rs773125    | 2.00E-08       |
| 24 390 342      | Rheumatoid arthritis                                   | 6             | 32 460 995     | rs9268839   | 1.00E-250      |
| 24 390 342      | Rheumatoid arthritis                                   | 6             | 32 460 995     | rs9268839   | 2.00E-145      |
| 24 390 342      | Rheumatoid arthritis                                   | 9             | 120 873 843    | rs10985070  | 5.00E-11       |
| 24 390 342      | Rheumatoid arthritis                                   | 9             | 120 873 843    | rs10985070  | 4.00E-09       |
| 24 390 342      | Rheumatoid arthritis                                   | 6             | 32 460 995     | rs9268839   | 1.00E-250      |
| 24 782 177      | Rheumatoid arthritis                                   | 9             | 120 889 023    | rs2072438   | 3.00E-09       |
| 23 720 494      | Blood trace element (Se levels)                        | 5             | 79 118 514     | rs506500    | 8.00E-12       |
| 21 156 761      | Rheumatoid arthritis                                   | 6             | 32 476 421     | rs12194148  | 5.00E-58       |
| 23 770 605      | Chronic lymphocytic leukemia                           | 6             | 32 658 495     | rs9273363   | 2.00E-10       |
| 24 064 335      | Fat body mass                                          | 1             | 150 755 063    | rs2230061   | 4.00E-08       |
| 24 094 242      | Serum alkaline phosphatase levels                      | 9             | 133 278 431    | rs651007    | 1.00E-56       |
| 24 097 066      | Sjögren's syndrome                                     | 6             | 32 623 176     | rs9271588   | 9.00E-37       |
| 23 850 713      | Crohn's disease                                        | 6             | 32 619 077     | rs9271366   | 5.00E-12       |
| 24 429 156      | Idiopathic pulmonary fibrosis                          | 17            | 45 847 931     | rs17690703  | 6.00E-09       |

(Continued)

**Supplementary Table SV Continued.**

| <b>PUBMEDID</b> | <b>DISEASE.TRAIT</b>                   | <b>CHR_ID</b> | <b>CHR_POS</b> | <b>SNPS</b> | <b>P.VALUE</b> |
|-----------------|----------------------------------------|---------------|----------------|-------------|----------------|
| 24 162 737      | Alzheimer's disease (late onset)       | 6             | 32 610 753     | rs9271192   | 3.00E-12       |
| 24 162 738      | Hepatitis B                            | 6             | 31 264 334     | rs3130542   | 9.00E-14       |
| 24 047 826      | Homoarginine levels                    | 15            | 45 360 505     | rs1153858   | 1.00E-45       |
| 22 751 097      | Coronary heart disease                 | 6             | 32 373 576     | rs9268402   | 3.00E-15       |
| 22 693 459      | Male-pattern baldness                  | 17            | 45 846 853     | rs12373124  | 5.00E-10       |
| 22 832 964      | Smoking behavior                       | 15            | 78 559 273     | rs2036527   | 2.00E-08       |
| 22 672 568      | Venous thromboembolism                 | 9             | 133 279 294    | rs495828    | 3.00E-16       |
| 22 797 724      | Lung adenocarcinoma                    | 6             | 32 400 310     | rs3817963   | 3.00E-10       |
| 22 797 727      | Renal function-related traits (BUN)    | 2             | 113 221 363    | rs11123170  | 3.00E-10       |
| 22 885 925      | Polycystic ovary syndrome              | 12            | 55 996 852     | rs705702    | 9.00E-26       |
| 22 837 378      | Airflow obstruction                    | 15            | 78 523 715     | rs8031948   | 3.00E-09       |
| 22 951 725      | Vitiligo                               | 12            | 56 007 301     | rs10876864  | 8.00E-12       |
| 22 960 999      | Esophageal cancer (squamous cell)      | 17            | 2 268 343      | rs17761864  | 2.00E-11       |
| 23 666 240      | Testicular germ cell tumor             | 21            | 46 270 154     | rs2839186   | 1.00E-09       |
| 23 472 185      | Multiple sclerosis (OCB status)        | 6             | 32 624 423     | rs9271640   | 2.00E-20       |
| 23 472 185      | Multiple sclerosis (OCB status)        | 6             | 32 695 854     | rs3129720   | 5.00E-15       |
| 23 472 185      | Multiple sclerosis (OCB status)        | 6             | 32 710 135     | rs9275563   | 6.00E-11       |
| 23 563 607      | Height                                 | 6             | 31 297 713     | rs2247056   | 4.00E-12       |
| 19 836 008      | Lung adenocarcinoma                    | 15            | 78 601 997     | rs1051730   | 2.00E-51       |
| 19 915 575      | Parkinson's disease                    | 17            | 45 641 777     | rs393152    | 2.00E-16       |
| 19 915 575      | Parkinson's disease                    | 17            | 46 751 565     | rs199533    | 1.00E-14       |
| 19 915 572      | Ulcerative colitis                     | 6             | 32 463 370     | rs9268877   | 4.00E-23       |
| 19 915 573      | Ulcerative colitis                     | 6             | 32 465 390     | rs2395185   | 5.00E-22       |
| 20 041 166      | HIV-1 control                          | 6             | 31 306 603     | rs9264942   | 6.00E-32       |
| 20 041 166      | HIV-1 control                          | 6             | 31 306 603     | rs9264942   | 6.00E-12       |
| 20 062 062      | Ankylosing spondylitis                 | 5             | 96 793 809     | rs27434     | 5.00E-12       |
| 20 062 062      | Ankylosing spondylitis                 | 6             | 31 368 323     | rs7743761   | 5.00E-304      |
| 20 066 004      | Angiotensin-converting enzyme activity | 9             | 133 279 294    | rs495828    | 3.00E-08       |
| 20 147 318      | E-selectin levels                      | 9             | 133 278 431    | rs651007    | 2.00E-82       |
| 20 167 578      | Soluble levels of adhesion molecules   | 9             | 133 278 724    | rs579459    | 2.00E-41       |
| 20 167 578      | Soluble levels of adhesion molecules   | 9             | 133 278 860    | rs649129    | 1.00E-15       |
| 20 190 752      | Celiac disease                         | 2             | 60 959 694     | rs13003464  | 4.00E-13       |
| 20 190 752      | Celiac disease                         | 6             | 32 638 107     | rs2187668   | 1.00E-50       |
| 20 228 798      | Ulcerative colitis                     | 6             | 32 465 058     | rs9268923   | 4.00E-15       |
| 20 410 501      | Vitiligo                               | 6             | 29 974 306     | rs3823355   | 9.00E-23       |
| 20 418 889      | Smoking behavior                       | 15            | 78 601 997     | rs1051730   | 2.00E-66       |
| 20 418 888      | Smoking behavior                       | 15            | 78 601 997     | rs1051730   | 2.00E-69       |
| 20 418 890      | Smoking behavior                       | 15            | 78 601 997     | rs1051730   | 3.00E-73       |
| 20 383 147      | Systemic sclerosis                     | 6             | 32 696 074     | rs6457617   | 4.00E-17       |
| 20 463 881      | Eye color traits                       | 17            | 81 629 785     | rs9894429   | 9.00E-14       |
| 20 463 881      | Eye color traits                       | 21            | 37 118 795     | rs1003719   | 2.00E-10       |
| 20 453 840      | Multiple sclerosis                     | 6             | 32 635 230     | rs2040406   | 1.00E-20       |
| 20 598 377      | Multiple sclerosis                     | 6             | 32 619 077     | rs9271366   | 4.00E-17       |
| 24 782 177      | Rheumatoid arthritis                   | 6             | 32 480 822     | rs7748270   | 4.00E-13       |
| 24 782 177      | Rheumatoid arthritis                   | 6             | 32 480 822     | rs7748270   | 1.00E-16       |

(Continued)

**Supplementary Table SV Continued.**

| <b>PUBMEDID</b> | <b>DISEASE.TRAIT</b>                        | <b>CHR_ID</b> | <b>CHR_POS</b> | <b>SNPS</b> | <b>P.VALUE</b> |
|-----------------|---------------------------------------------|---------------|----------------|-------------|----------------|
| 24 586 186      | Urinary metabolites (H-NMR features)        | 9             | 133 278 724    | rs579459    | 1.00E-28       |
| 24 586 186      | Urinary metabolites (H-NMR features)        | 9             | 133 278 724    | rs579459    | 2.00E-32       |
| 24 586 186      | Urinary metabolites (H-NMR features)        | 10            | 98 388 419     | rs2147896   | 3.00E-164      |
| 24 586 186      | Urinary metabolites (H-NMR features)        | 10            | 98 388 419     | rs2147896   | 8.00E-30       |
| 24 586 186      | Urinary metabolites (H-NMR features)        | 10            | 98 388 419     | rs2147896   | 2.00E-55       |
| 24 586 186      | Urinary metabolites (H-NMR features)        | 10            | 98 388 419     | rs2147896   | 6.00E-19       |
| 24 586 186      | Urinary metabolites (H-NMR features)        | 10            | 98 387 303     | rs4345897   | 2.00E-19       |
| 24 586 186      | Urinary metabolites (H-NMR features)        | 10            | 98 387 303     | rs4345897   | 4.00E-12       |
| 24 586 186      | Urinary metabolites (H-NMR features)        | 10            | 98 388 301     | rs4539242   | 2.00E-20       |
| 24 586 186      | Urinary metabolites (H-NMR features)        | 10            | 98 388 419     | rs2147896   | 4.00E-34       |
| 24 586 186      | Urinary metabolites (H-NMR features)        | 19            | 48 730 149     | rs281408    | 4.00E-32       |
| 24 586 186      | Urinary metabolites (H-NMR features)        | 19            | 48 725 015     | rs2287921   | 3.00E-36       |
| 24 586 186      | Urinary metabolites (H-NMR features)        | 19            | 48 725 015     | rs2287921   | 1.00E-12       |
| 24 586 186      | Urinary metabolites (H-NMR features)        | 19            | 48 725 015     | rs2287921   | 7.00E-19       |
| 24 625 756      | Serum metabolite levels                     | 1             | 151 910 380    | rs10788817  | 3.00E-13       |
| 24 816 252      | Blood metabolite levels                     | 1             | 45 618 711     | rs1053941   | 5.00E-11       |
| 24 816 252      | Blood metabolite levels                     | 1             | 151 867 362    | rs12566232  | 6.00E-19       |
| 24 816 252      | Blood metabolite levels                     | 9             | 133 278 431    | rs651007    | 6.00E-20       |
| 24 816 252      | Blood metabolite levels                     | 10            | 98 399 379     | rs4488133   | 0              |
| 24 816 252      | Blood metabolite levels                     | 10            | 98 399 379     | rs4488133   | 1.00E-48       |
| 24 842 889      | Parkinson's disease                         | 17            | 46 110 126     | rs17577094  | 8.00E-09       |
| 24 929 828      | Lung function (forced vital capacity)       | 11            | 43 626 818     | rs4237643   | 4.00E-08       |
| 24 871 463      | Systemic lupus erythematosus                | 6             | 32 711 222     | rs9275572   | 5.00E-16       |
| 24 816 252      | Blood metabolite levels                     | 1             | 151 886 412    | rs6685187   | 3.00E-26       |
| 24 816 252      | Blood metabolite ratios                     | 1             | 21 496 799     | rs1697421   | 2.00E-20       |
| 24 816 252      | Blood metabolite ratios                     | 1             | 21 496 799     | rs1697421   | 3.00E-14       |
| 24 816 252      | Blood metabolite ratios                     | 1             | 151 958 169    | rs6693388   | 4.00E-38       |
| 24 816 252      | Blood metabolite ratios                     | 9             | 133 278 860    | rs649129    | 9.00E-37       |
| 24 816 252      | Blood metabolite ratios                     | 9             | 133 279 294    | rs495828    | 6.00E-34       |
| 24 816 252      | Blood metabolite ratios                     | 9             | 133 278 724    | rs579459    | 1.00E-28       |
| 21 833 088      | Multiple sclerosis                          | 22            | 21 776 836     | rs2283792   | 5.00E-09       |
| 21 102 463      | Crohn's disease                             | 5             | 96 908 845     | rs2549794   | 1.00E-10       |
| 21 102 463      | Crohn's disease                             | 2             | 60 997 124     | rs10181042  | 7.00E-09       |
| 20 881 960      | Height                                      | 6             | 32 696 222     | rs6457620   | 2.00E-16       |
| 20 881 960      | Height                                      | 6             | 31 412 752     | rs2256183   | 8.00E-29       |
| 22 504 420      | Bone mineral density                        | 17            | 45 900 461     | rs1864325   | 5.00E-11       |
| 20 139 978      | Hematological and biochemical traits        | 9             | 133 279 294    | rs495828    | 4.00E-59       |
| 20 139 978      | Hematological and biochemical traits        | 9             | 133 279 294    | rs495828    | 1.00E-11       |
| 20 139 978      | Hematological and biochemical traits        | 9             | 133 279 294    | rs495828    | 6.00E-10       |
| 20 139 978      | Red blood cell count                        | 9             | 133 279 294    | rs495828    | 3.00E-12       |
| 23 028 483      | Asthma                                      | 6             | 32 411 712     | rs9268516   | 1.00E-08       |
| 27 225 129      | Educational attainment (college completion) | 12            | 56 023 144     | rs2456973   | 2.00E-09       |
| 27 669 027      | Emphysema distribution in smoking           | 15            | 78 510 527     | rs9788721   | 5.00E-10       |
| 27 669 027      | Emphysema distribution in smoking           | 15            | 78 510 527     | rs9788721   | 7.00E-12       |
| 27 927 781      | Serum parathyroid hormone levels            | 5             | 177 370 342    | rs4074995   | 3.00E-23       |

(Continued)

**Supplementary Table SV Continued.**

| PUBMEDID | DISEASE.TRAIT                                                      | CHR_ID | CHR_POS   | SNPS        | P.VALUE  |
|----------|--------------------------------------------------------------------|--------|-----------|-------------|----------|
| 27611488 | Adult asthma                                                       | 6      | 31120368  | rs3095318   | 2.00E-11 |
| 24262325 | Coronary artery disease or ischemic stroke                         | 9      | 133278724 | rs579459    | 2.00E-09 |
| 24262325 | Coronary artery disease or large artery stroke                     | 9      | 133278724 | rs579459    | 3.00E-08 |
| 24282030 | Hepatitis B vaccine response                                       | 6      | 32601914  | rs477515    | 3.00E-19 |
| 24376798 | Chronic hepatitis C infection                                      | 6      | 32711222  | rs9275572   | 4.00E-16 |
| 24149102 | Hodgkin's lymphoma                                                 | 6      | 32460508  | rs6903608   | 5.00E-27 |
| 24097068 | Cholesterol, total                                                 | 20     | 35564866  | rs2277862   | 5.00E-11 |
| 23128233 | Crohn's disease                                                    | 6      | 31306603  | rs9264942   | 5.00E-28 |
| 23143601 | Lung cancer                                                        | 6      | 32465390  | rs2395185   | 1.00E-08 |
| 23047291 | Response to temozolomide                                           | 10     | 129627758 | rs477692    | 1.00E-08 |
| 23144326 | Chronic obstructive pulmonary disease-related biomarkers           | 10     | 80028348  | rs12220777  | 7.00E-11 |
| 23144326 | Chronic obstructive pulmonary disease-related biomarkers           | 6      | 31272654  | rs2074488   | 2.00E-10 |
| 23273568 | Systemic lupus erythematosus                                       | 6      | 32606214  | rs9270984   | 5.00E-24 |
| 23222517 | Red blood cell traits                                              | 9      | 133278724 | rs579459    | 9.00E-18 |
| 23284291 | Pulmonary function (smoking interaction)                           | 16     | 75356418  | rs2865531   | 2.00E-08 |
| 23300138 | Tumor biomarkers                                                   | 15     | 43544280  | rs2251844   | 1.00E-14 |
| 23281178 | Metabolite levels                                                  | 10     | 98387303  | rs4345897   | 2.00E-91 |
| 23181788 | Asthma                                                             | 6      | 32636595  | rs9272346   | 2.00E-08 |
| 23321320 | Hepatitis C induced liver cirrhosis                                | 6      | 32400310  | rs3817963   | 1.00E-08 |
| 23321320 | Hepatitis C induced liver cirrhosis                                | 6      | 32433302  | rs3129860   | 1.00E-09 |
| 23349640 | Lymphoma                                                           | 6      | 32614112  | rs4530903   | 2.00E-08 |
| 23381943 | End-stage coagulation                                              | 9      | 133278431 | rs651007    | 2.00E-25 |
| 27005778 | Metabolite levels (small molecules and protein measures)           | 15     | 45354085  | rs61524473  | 1.00E-15 |
| 20383146 | Chronic kidney disease                                             | 15     | 45349027  | rs2453533   | 5.00E-22 |
| 27669027 | Emphysema distribution in smoking                                  | 15     | 78608359  | rs138544659 | 1.00E-14 |
| 27588450 | Glomerular filtration rate                                         | 15     | 45420141  | rs2486288   | 2.00E-08 |
| 27588450 | Glomerular filtration rate                                         | 5      | 177379635 | rs35716097  | 2.00E-17 |
| 27588450 | Glomerular filtration rate                                         | 15     | 45420141  | rs2486288   | 5.00E-12 |
| 27588450 | Glomerular filtration rate                                         | 5      | 177379635 | rs35716097  | 4.00E-09 |
| 27286809 | C-reactive protein levels or total cholesterol levels (pleiotropy) | 6      | 32700546  | rs2858310   | 4.00E-12 |
| 27286809 | C-reactive protein levels or LDL-cholesterol levels (pleiotropy)   | 6      | 32695512  | rs9275292   | 3.00E-08 |
| 27286809 | C-reactive protein levels or LDL-cholesterol levels (pleiotropy)   | 19     | 48725015  | rs2287921   | 3.00E-08 |
| 27286809 | C-reactive protein levels or HDL-cholesterol levels (pleiotropy)   | 6      | 32477914  | rs9378212   | 7.00E-10 |
| 27225129 | Educational attainment (years of education)                        | 7      | 72782785  | rs11976020  | 4.00E-08 |
| 27225129 | Educational attainment (years of education)                        | 12     | 56023144  | rs2456973   | 6.00E-16 |
| 26785701 | Waist-to-hip ratio adjusted for body mass index                    | 6      | 32482312  | rs5020946   | 1.00E-09 |
| 26785701 | Waist-to-hip ratio adjusted for body mass index                    | 6      | 32482312  | rs5020946   | 4.00E-08 |
| 26819262 | Epstein Barr virus nuclear antigen I IgG levels                    | 6      | 32465058  | rs9268923   | 1.00E-11 |
| 26819262 | Epstein Barr virus nuclear antigen I IgG levels                    | 6      | 32465058  | rs9268923   | 1.00E-11 |
| 26819262 | Epstein Barr virus nuclear antigen I IgG levels                    | 6      | 32465058  | rs9268923   | 1.00E-13 |

(Continued)

**Supplementary Table SV Continued.**

| <b>PUBMEDID</b> | <b>DISEASE.TRAIT</b>                                     | <b>CHR_ID</b> | <b>CHR_POS</b> | <b>SNPS</b> | <b>P.VALUE</b> |
|-----------------|----------------------------------------------------------|---------------|----------------|-------------|----------------|
| 26 831 199      | Glomerular filtration rate in non diabetics (creatinine) | 15            | 45 349 027     | rs2453533   | 5.00E-41       |
| 28 282 560      | Carotid plaque burden                                    | 10            | 102 727 625    | rs2902548   | 2.00E-08       |
| 28 232 668      | Nonsyndromic cleft lip with cleft palate                 | 12            | 56 041 628     | rs705704    | 1.00E-09       |
| 28 166 213      | Lung function (FEV1/FVC)                                 | 16            | 75 433 123     | rs3743609   | 4.00E-10       |
| 28 598 434      | Renal cell carcinoma                                     | 3             | 40 491 752     | rs67311347  | 3.00E-08       |
| 28 067 908      | Ulcerative colitis                                       | 5             | 177 361 569    | rs4976646   | 4.00E-08       |
| 28 067 908      | Inflammatory bowel disease                               | 2             | 60 977 721     | rs7608910   | 3.00E-28       |
| 28 067 908      | Inflammatory bowel disease                               | 5             | 96 917 099     | rs1363907   | 1.00E-10       |
| 28 067 908      | Inflammatory bowel disease                               | 5             | 177 361 569    | rs4976646   | 4.00E-09       |
| 28 158 719      | White blood cell count (lymphocyte)                      | 6             | 31 272 944     | rs2249742   | 4.00E-08       |
| 28 158 719      | White blood cell count (lymphocyte)                      | 6             | 31 274 397     | rs2524079   | 2.00E-08       |
| 28 158 719      | White blood cell count                                   | 6             | 31 274 397     | rs2524079   | 2.00E-08       |
| 28 165 464      | Chronic lymphocytic leukemia                             | 6             | 32 610 350     | rs9271176   | 3.00E-20       |
| 28 166 215      | Chronic obstructive pulmonary disease                    | 15            | 78 575 140     | rs17486278  | 2.00E-28       |
| 27 494 321      | Chronotype                                               | 2             | 54 127 790     | rs1075265   | 4.00E-08       |
| 27 494 321      | Morning vs. evening chronotype                           | 2             | 54 127 790     | rs1075265   | 4.00E-08       |
| 28 041 642      | Giant cell arteritis                                     | 6             | 32 464 300     | rs9268905   | 2.00E-54       |
| 27 659 466      | QRS complex (12-leadsum)                                 | 17            | 45 949 373     | rs242562    | 2.00E-14       |
| 27 182 965      | Tonsillectomy                                            | 9             | 133 279 427    | rs635634    | 9.00E-09       |
| 28 017 375      | Hematocrit                                               | 9             | 133 279 294    | rs495828    | 3.00E-09       |
| 28 017 375      | Hematocrit                                               | 9             | 133 278 431    | rs651007    | 7.00E-17       |
| 28 017 375      | Hemoglobin levels                                        | 9             | 133 279 294    | rs495828    | 2.00E-10       |
| 28 017 375      | Hemoglobin levels                                        | 9             | 133 279 294    | rs495828    | 1.00E-19       |
| 28 017 375      | Red blood cell count                                     | 9             | 133 278 724    | rs579459    | 4.00E-11       |
| 28 017 375      | Red blood cell count                                     | 17            | 45 749 271     | rs12150672  | 4.00E-09       |
| 28 017 375      | Red blood cell count                                     | 9             | 133 279 294    | rs495828    | 1.00E-08       |
| 27 182 965      | Parkinson's disease                                      | 17            | 45 628 235     | rs365825    | 4.00E-32       |
| 26 634 245      | Post bronchodilator FEV1                                 | 15            | 78 606 661     | rs56077333  | 5.00E-18       |
| 26 634 245      | Post bronchodilator FEV1                                 | 15            | 78 594 605     | rs4887067   | 5.00E-15       |
| 26 634 245      | Post bronchodilator FEV1                                 | 15            | 78 574 103     | rs140330585 | 1.00E-15       |
| 26 634 245      | Post bronchodilator FEV1                                 | 15            | 78 586 199     | rs951266    | 1.00E-15       |
| 26 634 245      | Post bronchodilator FEV1                                 | 15            | 78 570 111     | rs7172118   | 2.00E-15       |
| 26 634 245      | Post bronchodilator FEV1                                 | 15            | 78 585 039     | rs56390833  | 2.00E-15       |
| 26 634 245      | Post bronchodilator FEV1                                 | 15            | 78 593 856     | rs8192482   | 6.00E-15       |
| 26 634 245      | Post bronchodilator FEV1                                 | 15            | 78 590 583     | rs16969968  | 6.00E-15       |
| 26 634 245      | Post bronchodilator FEV1                                 | 15            | 78 576 294     | rs72740964  | 8.00E-15       |
| 26 634 245      | Post bronchodilator FEV1                                 | 15            | 78 601 997     | rs1051730   | 2.00E-15       |
| 26 634 245      | Post bronchodilator FEV1                                 | 15            | 78 569 722     | rs11633958  | 3.00E-14       |
| 26 634 245      | Post bronchodilator FEV1                                 | 15            | 78 523 715     | rs8031948   | 3.00E-15       |
| 26 634 245      | Post bronchodilator FEV1                                 | 15            | 78 557 437     | rs72740955  | 1.00E-14       |
| 26 634 245      | Post bronchodilator FEV1                                 | 15            | 78 535 744     | rs72738786  | 8.00E-14       |
| 26 634 245      | Post bronchodilator FEV1                                 | 15            | 78 559 273     | rs2036527   | 9.00E-15       |
| 26 634 245      | Post bronchodilator FEV1                                 | 15            | 78 619 330     | rs4243084   | 8.00E-14       |
| 25 305 756      | IgA nephropathy                                          | 6             | 32 692 101     | rs9275224   | 6.00E-30       |
| 25 305 756      | IgA nephropathy                                          | 6             | 32 692 101     | rs9275224   | 6.00E-18       |

(Continued)

**Supplementary Table SV Continued.**

| <b>PUBMEDID</b> | <b>DISEASE.TRAIT</b>                       | <b>CHR_ID</b> | <b>CHR_POS</b> | <b>SNPS</b> | <b>P.VALUE</b> |
|-----------------|--------------------------------------------|---------------|----------------|-------------|----------------|
| 25 305 756      | IgA nephropathy                            | 6             | 32 692 101     | rs9275224   | 8.00E-14       |
| 25 305 756      | IgA nephropathy                            | 6             | 32 702 531     | rs2856717   | 1.00E-15       |
| 25 305 756      | IgA nephropathy                            | 6             | 32 702 531     | rs2856717   | 5.00E-10       |
| 25 305 756      | IgA nephropathy                            | 6             | 32 713 854     | rs9275596   | 3.00E-31       |
| 25 305 756      | IgA nephropathy                            | 6             | 32 713 854     | rs9275596   | 2.00E-15       |
| 25 305 756      | IgA nephropathy                            | 6             | 32 713 854     | rs9275596   | 1.00E-19       |
| 25 710 614      | Peanut allergy                             | 6             | 32 713 854     | rs9275596   | 6.00E-11       |
| 25 607 358      | Subcortical brain region volumes           | 17            | 45 816 350     | rs8072451   | 1.00E-08       |
| 25 903 422      | Psoriasis                                  | 6             | 111 352 511    | rs240993    | 1.00E-08       |
| 26 028 593      | IgA nephropathy                            | 11            | 44 066 439     | rs2074038   | 4.00E-09       |
| 26 028 593      | IgA nephropathy                            | 6             | 29 974 166     | rs2523946   | 5.00E-11       |
| 26 077 951      | Corticobasal degeneration                  | 17            | 45 641 777     | rs393152    | 1.00E-12       |
| 25 574 825      | Psoriasis                                  | 6             | 111 352 511    | rs240993    | 1.00E-14       |
| 25 574 825      | Inflammatory skin disease                  | 1             | 152 189 630    | rs12130219  | 1.00E-23       |
| 25 574 825      | Inflammatory skin disease                  | 19            | 48 737 757     | rs380743    | 4.00E-22       |
| 20 228 799      | Ulcerative colitis                         | 2             | 60 959 694     | rs13003464  | 7.00E-09       |
| 20 228 799      | Ulcerative colitis                         | 6             | 32 465 390     | rs2395185   | 9.00E-23       |
| 26 030 696      | Emphysema imaging phenotypes               | 15            | 78 606 590     | rs55676755  | 2.00E-09       |
| 26 831 199      | Chronic kidney disease                     | 15            | 45 406 595     | rs2467853   | 2.00E-11       |
| 26 068 415      | Acylcarnitine levels                       | 1             | 151 934 697    | rs10494270  | 5.00E-13       |
| 26 831 199      | Glomerular filtration rate (creatinine)    | 15            | 45 406 595     | rs2467853   | 1.00E-42       |
| 26 959 369      | S-phenylmercapturic acid levels in smokers | 22            | 23 921 902     | rs6003958   | 2.00E-46       |
| 25 961 943      | Cholesterol, total                         | 20            | 35 537 447     | rs6579245   | 1.00E-08       |
| 26 077 951      | Corticobasal degeneration                  | 17            | 45 846 317     | rs12185268  | 1.00E-09       |
| 26 582 766      | LDL cholesterol                            | 9             | 133 278 724    | rs579459    | 6.00E-13       |
| 26 582 766      | Cholesterol, total                         | 9             | 133 278 724    | rs579459    | 3.00E-10       |
| 27 285 765      | Cervical cancer                            | 6             | 32 616 804     | rs73730372  | 3.00E-19       |
| 26 525 574      | Collagenous colitis                        | 6             | 32 638 107     | rs2187668   | 2.00E-11       |
| 26 343 387      | Myocardial infarction                      | 1             | 222 638 065    | rs35700460  | 2.00E-11       |
| 27 501 781      | EGFR mutation-positive lung adenocarcinoma | 6             | 32 400 310     | rs3817963   | 1.00E-16       |
| 26 198 764      | Schizophrenia                              | 6             | 32 668 221     | rs9274623   | 6.00E-19       |
| 26 192 919      | Ulcerative colitis                         | 6             | 32 611 258     | rs9271209   | 2.00E-85       |
| 26 192 919      | Ulcerative colitis                         | 2             | 60 977 721     | rs7608910   | 1.00E-23       |
| 26 192 919      | Ulcerative colitis                         | 5             | 177 361 569    | rs4976646   | 3.00E-09       |
| 26 192 919      | Ulcerative colitis                         | 2             | 218 286 495    | rs2382817   | 2.00E-08       |
| 26 192 919      | Crohn's disease                            | 6             | 31 306 603     | rs9264942   | 5.00E-25       |
| 26 192 919      | Crohn's disease                            | 2             | 60 977 721     | rs7608910   | 3.00E-23       |
| 26 192 919      | Crohn's disease                            | 5             | 96 917 099     | rs1363907   | 4.00E-16       |
| 26 192 919      | Crohn's disease                            | 2             | 218 286 495    | rs2382817   | 4.00E-09       |
| 26 192 919      | Crohn's disease                            | 5             | 177 361 569    | rs4976646   | 3.00E-08       |
| 26 192 919      | Inflammatory bowel disease                 | 2             | 60 977 721     | rs7608910   | 3.00E-36       |
| 26 192 919      | Inflammatory bowel disease                 | 5             | 150 943 866    | rs17800987  | 2.00E-31       |
| 26 192 919      | Inflammatory bowel disease                 | 2             | 218 256 940    | rs11677953  | 3.00E-15       |
| 26 192 919      | Inflammatory bowel disease                 | 5             | 96 917 099     | rs1363907   | 5.00E-15       |
| 26 192 919      | Inflammatory bowel disease                 | 5             | 177 361 569    | rs4976646   | 3.00E-12       |

(Continued)



**Supplementary Table SV Continued.**

| <b>PUBMEDID</b> | <b>DISEASE.TRAIT</b>                | <b>CHR_ID</b> | <b>CHR_POS</b> | <b>SNPS</b> | <b>P.VALUE</b> |
|-----------------|-------------------------------------|---------------|----------------|-------------|----------------|
| 26 272 126      | Kidney stones                       | 5             | 177 367 190    | rs12654812  | 6.00E-11       |
| 26 343 387      | Coronary artery disease             | 1             | 222 650 401    | rs67180937  | 1.00E-12       |
| 26 316 170      | Systemic lupus erythematosus        | 6             | 32 638 107     | rs2187668   | 1.00E-09       |
| 26 316 170      | Systemic lupus erythematosus        | 6             | 32 689 659     | rs3129716   | 4.00E-09       |
| 26 198 764      | Schizophrenia                       | 6             | 28 338 894     | rs13217619  | 2.00E-29       |
| 26 634 245      | Pre bronchodilator FEV1             | 15            | 78 559 273     | rs2036527   | 2.00E-09       |
| 26 634 245      | Pre bronchodilator FEV1             | 15            | 78 601 997     | rs1051730   | 2.00E-09       |
| 26 634 245      | Pre bronchodilator FEV1             | 15            | 78 590 583     | rs16969968  | 2.00E-09       |
| 26 634 245      | Pre bronchodilator FEV1             | 15            | 78 586 199     | rs951266    | 2.00E-09       |
| 26 634 245      | Pre bronchodilator FEV1             | 15            | 78 513 681     | rs8034191   | 3.00E-09       |
| 26 634 245      | Pre bronchodilator FEV1             | 15            | 78 533 838     | rs931794    | 4.00E-09       |
| 26 634 245      | Pre bronchodilator FEV1 /FVC ratio  | 15            | 78 601 997     | rs1051730   | 9.00E-11       |
| 26 634 245      | Pre bronchodilator FEV1 /FVC ratio  | 15            | 78 590 583     | rs16969968  | 2.00E-10       |
| 26 634 245      | Pre bronchodilator FEV1 /FVC ratio  | 15            | 78 513 681     | rs8034191   | 2.00E-10       |
| 26 634 245      | Pre bronchodilator FEV1 /FVC ratio  | 15            | 78 586 199     | rs951266    | 2.00E-10       |
| 26 634 245      | Pre bronchodilator FEV1 /FVC ratio  | 15            | 78 533 838     | rs931794    | 8.00E-10       |
| 26 634 245      | Pre bronchodilator FEV1 /FVC ratio  | 15            | 78 559 273     | rs2036527   | 4.00E-10       |
| 26 634 245      | Post bronchodilator FEV1 /FVC ratio | 15            | 78 606 661     | rs56077333  | 1.00E-19       |
| 26 634 245      | Post bronchodilator FEV1 /FVC ratio | 15            | 78 574 103     | rs140330585 | 5.00E-17       |
| 26 634 245      | Post bronchodilator FEV1 /FVC ratio | 15            | 78 570 111     | rs7172118   | 6.00E-17       |
| 26 634 245      | Post bronchodilator FEV1 /FVC ratio | 15            | 78 590 583     | rs16969968  | 1.00E-15       |
| 26 634 245      | Post bronchodilator FEV1 /FVC ratio | 15            | 78 594 605     | rs4887067   | 3.00E-15       |
| 26 634 245      | Post bronchodilator FEV1 /FVC ratio | 15            | 78 593 856     | rs8192482   | 3.00E-15       |
| 26 634 245      | Post bronchodilator FEV1 /FVC ratio | 15            | 78 601 997     | rs1051730   | 1.00E-16       |
| 26 634 245      | Post bronchodilator FEV1 /FVC ratio | 15            | 78 586 199     | rs951266    | 2.00E-16       |
| 26 634 245      | Post bronchodilator FEV1 /FVC ratio | 15            | 78 576 294     | rs72740964  | 7.00E-16       |
| 26 634 245      | Post bronchodilator FEV1 /FVC ratio | 15            | 78 585 039     | rs56390833  | 7.00E-16       |
| 26 634 245      | Post bronchodilator FEV1 /FVC ratio | 15            | 78 557 437     | rs72740955  | 7.00E-16       |
| 26 634 245      | Post bronchodilator FEV1 /FVC ratio | 15            | 78 569 722     | rs11633958  | 1.00E-14       |
| 26 634 245      | Post bronchodilator FEV1 /FVC ratio | 15            | 78 559 273     | rs2036527   | 7.00E-16       |
| 26 634 245      | Post bronchodilator FEV1 /FVC ratio | 15            | 78 523 715     | rs8031948   | 3.00E-15       |
| 26 634 245      | Post bronchodilator FEV1 /FVC ratio | 15            | 78 535 744     | rs72738786  | 4.00E-14       |
| 26 634 245      | Post bronchodilator FEV1 /FVC ratio | 15            | 78 619 330     | rs4243084   | 2.00E-14       |
| 26 634 245      | Post bronchodilator FEV1 /FVC ratio | 15            | 78 533 838     | rs931794    | 4.00E-11       |
| 26 634 245      | Post bronchodilator FEV1            | 15            | 78 533 838     | rs931794    | 2.00E-11       |
| 26 634 245      | Post bronchodilator FEV1            | 15            | 78 521 704     | rs10519203  | 6.00E-12       |
| 26 634 245      | Post bronchodilator FEV1            | 15            | 78 510 527     | rs9788721   | 2.00E-14       |
| 26 634 245      | Post bronchodilator FEV1            | 15            | 78 603 787     | rs1317286   | 3.00E-14       |
| 26 634 245      | Post bronchodilator FEV1            | 15            | 78 513 681     | rs8034191   | 1.00E-13       |
| 26 634 245      | Post bronchodilator FEV1            | 15            | 78 565 644     | rs55781567  | 7.00E-15       |
| 26 634 245      | Post bronchodilator FEV1            | 15            | 78 556 692     | rs58365910  | 7.00E-15       |
| 26 634 245      | Post bronchodilator FEV1            | 15            | 78 509 052     | rs11852372  | 3.00E-13       |
| 26 634 245      | Post bronchodilator FEV1            | 15            | 78 525 587     | rs8042849   | 4.00E-15       |
| 26 634 245      | Post bronchodilator FEV1            | 15            | 78 565 597     | rs55853698  | 7.00E-14       |
| 26 634 245      | Post bronchodilator FEV1            | 15            | 78 572 855     | rs17486195  | 2.00E-15       |

(Continued)

**Supplementary Table SV Continued.**

| PUBMEDID   | DISEASE.TRAIT                                   | CHR_ID | CHR_POS     | SNPS       | P.VALUE  |
|------------|-------------------------------------------------|--------|-------------|------------|----------|
| 26 634 245 | Post bronchodilator FEV1                        | 15     | 78 581 651  | rs7180002  | 1.00E-15 |
| 25 673 412 | Waist-to-hip ratio adjusted for body mass index | 6      | 32 413 959  | rs7759742  | 4.00E-11 |
| 25 673 412 | Waist-to-hip ratio adjusted for body mass index | 6      | 32 413 959  | rs7759742  | 2.00E-11 |
| 23 128 233 | Inflammatory bowel disease                      | 5      | 96 917 099  | rs1363907  | 6.00E-13 |
| 23 128 233 | Inflammatory bowel disease                      | 2      | 60 977 721  | rs7608910  | 9.00E-32 |
| 23 128 233 | Inflammatory bowel disease                      | 2      | 218 286 495 | rs2382817  | 4.00E-12 |
| 23 128 233 | Inflammatory bowel disease                      | 5      | 177 367 190 | rs12654812 | 2.00E-08 |
| 26 301 688 | Pediatric autoimmune diseases                   | 12     | 56 002 984  | rs1689510  | 4.00E-09 |
| 28 448 500 | Waist-to-hip ratio adjusted for body mass index | 6      | 32 480 621  | rs9378213  | 4.00E-08 |
| 27 863 252 | Eosinophil percentage of white cells            | 6      | 29 832 434  | rs12662618 | 5.00E-16 |
| 27 863 252 | Eosinophil percentage of white cells            | 6      | 30 102 205  | rs1111180  | 4.00E-37 |
| 27 863 252 | Eosinophil percentage of white cells            | 6      | 31 415 134  | rs1882     | 5.00E-19 |
| 27 863 252 | Eosinophil percentage of white cells            | 6      | 32 619 436  | rs28383314 | 7.00E-27 |
| 27 863 252 | Eosinophil percentage of white cells            | 12     | 56 007 301  | rs10876864 | 4.00E-14 |
| 27 863 252 | Eosinophil counts                               | 12     | 56 055 651  | rs7302200  | 3.00E-13 |
| 27 863 252 | Eosinophil counts                               | 6      | 32 619 436  | rs28383314 | 1.00E-60 |
| 27 863 252 | Eosinophil counts                               | 6      | 29 967 473  | rs3893464  | 8.00E-55 |
| 25 006 744 | Local histogram emphysema pattern               | 15     | 78 575 140  | rs17486278 | 8.00E-13 |
| 25 006 744 | Local histogram emphysema pattern               | 15     | 78 510 527  | rs9788721  | 2.00E-13 |
| 25 006 744 | Local histogram emphysema pattern               | 15     | 78 509 052  | rs11852372 | 2.00E-10 |
| 25 064 009 | Parkinson's disease                             | 17     | 45 917 282  | rs17649553 | 2.00E-48 |
| 24 920 014 | Hodgkin's lymphoma                              | 6      | 32 460 508  | rs6903608  | 7.00E-31 |
| 25 186 300 | Antinuclear antibody levels                     | 6      | 32 465 390  | rs2395185  | 1.00E-11 |
| 25 147 783 | Vitamin B levels in ischemic stroke             | 1      | 21 496 799  | rs1697421  | 7.00E-10 |
| 25 102 180 | Type 2 diabetes                                 | 6      | 31 379 674  | rs2244020  | 7.00E-09 |
| 25 006 744 | Local histogram emphysema pattern               | 15     | 78 575 140  | rs17486278 | 5.00E-10 |
| 25 006 744 | Local histogram emphysema pattern               | 15     | 78 510 527  | rs9788721  | 1.00E-12 |
| 25 231 870 | Menarche (age at onset)                         | 6      | 29 954 963  | rs16896742 | 3.00E-10 |
| 27 997 041 | Ischemic stroke                                 | 9      | 133 279 427 | rs635634   | 5.00E-09 |
| 28 076 899 | Sjögren's syndrome                              | 6      | 32 622 724  | rs9271573  | 3.00E-42 |
| 28 076 899 | Sjögren's syndrome                              | 7      | 128 939 612 | rs3823536  | 3.00E-14 |
| 28 076 899 | Sjögren's syndrome                              | 6      | 32 622 724  | rs9271573  | 3.00E-34 |
| 28 076 899 | Sjögren's syndrome                              | 7      | 128 939 612 | rs3823536  | 7.00E-11 |
| 25 673 412 | Hip circumference adjusted for BMI              | 6      | 31 384 854  | rs7741091  | 2.00E-08 |
| 25 673 412 | Hip circumference adjusted for BMI              | 9      | 120 731 784 | rs7044106  | 6.00E-09 |
| 28 067 908 | Crohn's disease                                 | 5      | 96 917 099  | rs1363907  | 1.00E-14 |
| 28 067 908 | Crohn's disease                                 | 2      | 60 977 721  | rs7608910  | 6.00E-14 |
| 28 067 908 | Ulcerative colitis                              | 2      | 60 977 721  | rs7608910  | 4.00E-23 |
| 23 326 239 | Epstein-Barr virus immune response (EBNA-1)     | 6      | 32 601 914  | rs477515   | 3.00E-13 |
| 23 349 640 | Lymphoma                                        | 6      | 32 614 112  | rs4530903  | 3.00E-12 |
| 23 349 640 | Lymphoma                                        | 6      | 32 461 866  | rs9268853  | 2.00E-10 |
| 23 349 640 | Lymphoma                                        | 6      | 32 700 323  | rs2647045  | 4.00E-10 |
| 23 472 185 | Multiple sclerosis (OCB status)                 | 6      | 32 400 310  | rs3817963  | 6.00E-10 |
| 23 535 967 | Glomerular filtration rate                      | 15     | 45 426 989  | rs17536527 | 8.00E-10 |

(Continued)

**Supplementary Table SV Continued.**

| PUBMEDID   | DISEASE.TRAIT                                                        | CHR_ID | CHR_POS     | SNPS       | P.VALUE  |
|------------|----------------------------------------------------------------------|--------|-------------|------------|----------|
| 23 535 730 | Ovarian cancer                                                       | 8      | 81 741 409  | rs11782652 | 6.00E-09 |
| 23 535 730 | Ovarian cancer                                                       | 8      | 81 741 409  | rs11782652 | 7.00E-10 |
| 23 482 656 | Cervical cancer                                                      | 6      | 31 422 633  | rs2516448  | 4.00E-18 |
| 23 417 110 | Beta-2 microglubulin plasma levels                                   | 6      | 31 270 541  | rs9264638  | 2.00E-23 |
| 23 583 980 | Interstitial lung disease                                            | 17     | 45 979 401  | rs1981997  | 9.00E-14 |
| 23 636 237 | Dietary macronutrient intake                                         | 19     | 48 745 473  | rs838145   | 4.00E-10 |
| 25 282 103 | Height                                                               | 6      | 31 304 484  | rs6457374  | 8.00E-35 |
| 25 282 103 | Height                                                               | 20     | 35 844 748  | rs2425163  | 3.00E-52 |
| 25 607 358 | Subcortical brain region volumes                                     | 17     | 45 829 462  | rs17689882 | 8.00E-09 |
| 25 616 667 | Immunoglobulin G index levels in multiple sclerosis                  | 6      | 32 696 074  | rs6457617  | 7.00E-17 |
| 25 616 667 | Oligoclonal band status in multiple sclerosis                        | 6      | 32 624 423  | rs9271640  | 5.00E-12 |
| 28 642 124 | Huntington's disease progression                                     | 5      | 80 619 201  | rs1232027  | 1.00E-10 |
| 27 863 252 | Sum eosinophil basophil counts                                       | 12     | 55 991 020  | rs705699   | 5.00E-12 |
| 27 863 252 | Sum eosinophil basophil counts                                       | 6      | 32 619 436  | rs28383314 | 9.00E-64 |
| 27 863 252 | Sum eosinophil basophil counts                                       | 6      | 29 967 473  | rs3893464  | 7.00E-54 |
| 27 863 252 | Sum neutrophil eosinophil counts                                     | 6      | 32 623 176  | rs9271588  | 4.00E-66 |
| 27 863 252 | Sum neutrophil eosinophil counts                                     | 6      | 31 274 397  | rs2524079  | 6.00E-68 |
| 27 863 252 | Sum neutrophil eosinophil counts                                     | 9      | 133 279 427 | rs635634   | 1.00E-19 |
| 27 863 252 | Sum basophil neutrophil counts                                       | 6      | 32 623 176  | rs9271588  | 2.00E-58 |
| 27 863 252 | Sum basophil neutrophil counts                                       | 6      | 31 274 397  | rs2524079  | 2.00E-68 |
| 27 863 252 | Sum basophil neutrophil counts                                       | 9      | 133 279 427 | rs635634   | 4.00E-19 |
| 27 863 252 | Eosinophil percentage of granulocytes                                | 6      | 29 832 434  | rs12662618 | 1.00E-17 |
| 27 863 252 | Eosinophil percentage of granulocytes                                | 6      | 30 102 205  | rs1111180  | 2.00E-35 |
| 27 863 252 | Eosinophil percentage of granulocytes                                | 12     | 56 007 301  | rs10876864 | 1.00E-11 |
| 28 443 625 | Waist-to-hip ratio adjusted for BMI (adjusted for smoking behaviour) | 6      | 32 413 959  | rs7759742  | 1.00E-09 |
| 28 443 625 | Waist-to-hip ratio adjusted for BMI (adjusted for smoking behaviour) | 6      | 31 268 790  | rs1049281  | 1.00E-18 |
| 28 443 625 | Waist-to-hip ratio adjusted for BMI in non-smokers                   | 6      | 31 268 790  | rs1049281  | 2.00E-08 |
| 27 863 252 | Granulocyte count                                                    | 6      | 31 274 397  | rs2524079  | 9.00E-69 |
| 27 863 252 | Granulocyte count                                                    | 6      | 32 623 176  | rs9271588  | 2.00E-66 |
| 27 863 252 | Granulocyte count                                                    | 9      | 133 279 427 | rs635634   | 5.00E-20 |
| 27 863 252 | Granulocyte percentage of myeloid white cells                        | 1      | 150 602 219 | rs11204677 | 1.00E-39 |
| 27 863 252 | Granulocyte percentage of myeloid white cells                        | 6      | 31 266 717  | rs9264533  | 4.00E-33 |
| 27 863 252 | Hematocrit                                                           | 6      | 29 949 108  | rs9260313  | 1.00E-15 |
| 27 863 252 | Hematocrit                                                           | 17     | 45 733 706  | rs17563683 | 2.00E-28 |
| 27 863 252 | Hemoglobin concentration                                             | 1      | 45 607 817  | rs2230657  | 3.00E-13 |
| 25 574 825 | Inflammatory skin disease                                            | 6      | 111 261 682 | rs9487605  | 1.00E-16 |
| 25 574 825 | Inflammatory skin disease                                            | 6      | 111 352 511 | rs240993   | 6.00E-18 |
| 25 574 825 | Inflammatory skin disease                                            | 12     | 56 042 145  | rs1131017  | 4.00E-08 |
| 25 581 431 | Epithelial ovarian cancer                                            | 8      | 81 741 409  | rs11782652 | 3.00E-10 |
| 25 581 431 | Epithelial ovarian cancer                                            | 17     | 46 710 944  | rs183211   | 2.00E-13 |
| 25 827 949 | Cutaneous lupus erythematosus                                        | 6      | 32 638 107  | rs2187668  | 4.00E-10 |
| 25 827 949 | Cutaneous lupus erythematosus                                        | 6      | 31 133 897  | rs3130564  | 4.00E-10 |
| 22 412 388 | Crohn's disease                                                      | 2      | 60 959 694  | rs13003464 | 5.00E-09 |

(Continued)

**Supplementary Table SV Continued.**

| <b>PUBMEDID</b> | <b>DISEASE.TRAIT</b>                                                | <b>CHR_ID</b> | <b>CHR_POS</b> | <b>SNPS</b> | <b>P.VALUE</b> |
|-----------------|---------------------------------------------------------------------|---------------|----------------|-------------|----------------|
| 25 673 413      | Body mass index                                                     | 11            | 43 842 728     | rs2176598   | 3.00E-08       |
| 25 673 413      | Body mass index                                                     | 11            | 43 842 728     | rs2176598   | 3.00E-08       |
| 24 076 602      | Multiple sclerosis                                                  | 22            | 21 776 836     | rs2283792   | 6.00E-16       |
| 28 892 062      | Body mass index                                                     | 17            | 36 558 947     | rs12150665  | 5.00E-11       |
| 25 751 625      | Breast cancer                                                       | 5             | 82 242 227     | rs7707921   | 5.00E-11       |
| 28 928 442      | Chickenpox                                                          | 6             | 30 072 514     | rs10947050  | 1.00E-10       |
| 28 928 442      | Chickenpox                                                          | 6             | 31 475 135     | rs79501286  | 2.00E-09       |
| 28 928 442      | Chickenpox                                                          | 6             | 31 352 732     | rs9266089   | 1.00E-10       |
| 28 928 442      | Childhood ear infection                                             | 6             | 32 436 600     | rs3129868   | 6.00E-10       |
| 29 093 273      | GIP levels in response to oral glucose tolerance test (120 minutes) | 9             | 133 279 427    | rs635634    | 7.00E-14       |
| 29 196 614      | Nodular sclerosis Hodgkin lymphoma                                  | 6             | 32 473 323     | rs9269081   | 2.00E-39       |
| 27 618 452      | Systolic blood pressure                                             | 9             | 120 824 459    | rs10760117  | 6.00E-10       |
| 27 618 452      | Diastolic blood pressure                                            | 6             | 32 638 107     | rs2187668   | 4.00E-11       |
| 29 212 778      | Coronary artery disease                                             | 5             | 9 552 226      | rs17263917  | 2.00E-12       |
| 29 212 778      | Coronary artery disease                                             | 16            | 75 428 157     | rs12930452  | 1.00E-15       |
| 29 212 778      | Coronary artery disease                                             | 9             | 133 279 294    | rs495828    | 9.00E-12       |
| 29 212 778      | Coronary artery disease                                             | 1             | 222 664 597    | rs17465982  | 9.00E-28       |
| 29 212 778      | Coronary artery disease                                             | 1             | 222 650 187    | rs17465637  | 8.00E-31       |
| 29 212 778      | Coronary artery disease                                             | 5             | 9 556 582      | rs1508798   | 5.00E-13       |
| 29 212 778      | Coronary artery disease                                             | 5             | 56 903 375     | rs832540    | 2.00E-08       |
| 29 212 778      | Coronary artery disease                                             | 16            | 75 298 143     | rs4888378   | 6.00E-15       |
| 29 212 778      | Coronary artery disease                                             | 11            | 43 675 367     | rs7116641   | 1.00E-08       |
| 29 212 778      | Coronary artery disease                                             | 5             | 9 545 986      | rs112941079 | 4.00E-13       |
| 29 255 261      | Neuroticism                                                         | 17            | 45 733 530     | rs77804065  | 8.00E-26       |
| 29 255 261      | Neuroticism                                                         | 17            | 46 021 601     | rs17652520  | 1.00E-25       |
| 29 255 261      | Neuroticism                                                         | 17            | 45 876 353     | rs2214258   | 2.00E-25       |
| 29 255 261      | Neuroticism                                                         | 17            | 45 610 951     | rs28768976  | 1.00E-25       |
| 29 255 261      | Neuroticism                                                         | 17            | 45 496 053     | rs62065453  | 2.00E-24       |
| 29 255 261      | Neuroticism                                                         | 17            | 46 274 021     | rs2732708   | 2.00E-23       |
| 29 255 261      | Neuroticism                                                         | 17            | 46 696 417     | rs199441    | 3.00E-20       |
| 29 255 261      | Neuroticism                                                         | 17            | 46 797 087     | rs1563304   | 3.00E-10       |
| 26 651 848      | Sarcoidosis (non-Lofgren's syndrome)                                | 6             | 32 481 634     | rs1964995   | 3.00E-32       |
| 26 414 677      | Menopause (age at onset)                                            | 17            | 43 093 449     | rs1799949   | 8.00E-11       |
| 26 414 677      | Menopause (age at onset)                                            | 19            | 22 324 903     | rs7259376   | 4.00E-08       |
| 28 892 059      | Parkinson's disease                                                 | 17            | 45 917 282     | rs17649553  | 1.00E-68       |
| 28 869 591      | Heel bone mineral density                                           | 6             | 29 951 332     | rs9260426   | 3.00E-11       |
| 28 869 591      | Heel bone mineral density                                           | 10            | 121 947 868    | rs10749436  | 3.00E-10       |
| 28 869 591      | Heel bone mineral density                                           | 6             | 29 951 332     | rs9260426   | 2.00E-08       |
| 23 749 187      | Ankylosing spondylitis                                              | 6             | 29 975 879     | rs2394250   | 8.00E-51       |
| 24 076 602      | Multiple sclerosis                                                  | 5             | 177 361 569    | rs4976646   | 4.00E-18       |
| 24 076 602      | Multiple sclerosis                                                  | 3             | 121 824 730    | rs1920296   | 7.00E-22       |
| 27 863 252      | Mean platelet volume                                                | 1             | 112 567 997    | rs1001494   | 2.00E-13       |
| 27 863 252      | Mean platelet volume                                                | 1             | 171 675 446    | rs236907    | 1.00E-13       |
| 27 863 252      | Mean platelet volume                                                | 2             | 218 229 211    | rs17572109  | 4.00E-15       |
| 27 863 252      | Mean platelet volume                                                | 9             | 239 313        | rs471756    | 4.00E-09       |

(Continued)

**Supplementary Table SV Continued.**

| <b>PUBMEDID</b> | <b>DISEASE.TRAIT</b>                  | <b>CHR_ID</b> | <b>CHR_POS</b> | <b>SNPS</b> | <b>P.VALUE</b> |
|-----------------|---------------------------------------|---------------|----------------|-------------|----------------|
| 27 863 252      | Mean platelet volume                  | 11            | 838 722        | rs6762      | 8.00E-09       |
| 27 863 252      | Mean platelet volume                  | 19            | 48 728 969     | rs2287922   | 1.00E-11       |
| 27 863 252      | Reticulocyte count                    | 2             | 218 274 217    | rs4791      | 2.00E-16       |
| 27 863 252      | Reticulocyte count                    | 6             | 29 854 655     | rs58005484  | 2.00E-20       |
| 27 863 252      | Reticulocyte count                    | 17            | 46 115 252     | rs4606752   | 1.00E-17       |
| 27 863 252      | Neutrophil count                      | 6             | 31 274 397     | rs2524079   | 1.00E-67       |
| 27 863 252      | Neutrophil count                      | 6             | 32 623 176     | rs9271588   | 1.00E-58       |
| 27 863 252      | Neutrophil count                      | 9             | 133 279 427    | rs635634    | 8.00E-19       |
| 27 863 252      | Neutrophil percentage of granulocytes | 6             | 29 832 434     | rs12662618  | 5.00E-15       |
| 27 863 252      | Neutrophil percentage of granulocytes | 12            | 56 007 301     | rs10876864  | 7.00E-11       |
| 27 863 252      | Plateletcrit                          | 17            | 2 254 480      | rs12943566  | 5.00E-33       |
| 27 863 252      | Platelet count                        | 1             | 25 409 878     | rs111941366 | 6.00E-32       |
| 27 863 252      | Platelet count                        | 1             | 112 659 795    | rs2932536   | 2.00E-21       |
| 27 863 252      | Platelet count                        | 2             | 218 229 211    | rs17572109  | 7.00E-19       |
| 27 863 252      | Platelet distribution width           | 1             | 25 409 878     | rs111941366 | 4.00E-13       |
| 27 863 252      | Platelet distribution width           | 1             | 112 611 778    | rs7546094   | 9.00E-31       |
| 27 863 252      | Platelet distribution width           | 1             | 171 766 897    | rs6689125   | 6.00E-23       |
| 27 863 252      | Platelet distribution width           | 2             | 218 229 211    | rs17572109  | 6.00E-26       |
| 27 863 252      | Platelet distribution width           | 6             | 31 415 134     | rs1882      | 1.00E-19       |
| 27 863 252      | Red cell distribution width           | 2             | 218 276 735    | rs4674280   | 2.00E-13       |
| 27 863 252      | White blood cell count                | 6             | 31 274 397     | rs2524079   | 2.00E-126      |
| 27 863 252      | White blood cell count                | 6             | 32 482 312     | rs5020946   | 1.00E-94       |
| 27 863 252      | White blood cell count                | 9             | 133 279 427    | rs635634    | 2.00E-20       |
| 27 863 252      | High light scatter reticulocyte count | 2             | 218 274 217    | rs4791      | 9.00E-16       |
| 27 863 252      | High light scatter reticulocyte count | 17            | 46 115 252     | rs4606752   | 2.00E-16       |
| 29 326 435      | Intelligence (MTAG)                   | 6             | 79 113 207     | rs9443645   | 6.00E-10       |
| 29 326 435      | Intelligence (MTAG)                   | 12            | 56 007 301     | rs10876864  | 2.00E-12       |
| 29 326 435      | Intelligence (MTAG)                   | 17            | 45 753 572     | rs17426174  | 6.00E-11       |
| 29 326 435      | Intelligence (MTAG)                   | 17            | 46 722 680     | rs7224296   | 5.00E-09       |
| 29 326 435      | Intelligence (MTAG)                   | 17            | 46 785 767     | rs916888    | 2.00E-08       |
| 29 397 368      | Headache                              | 17            | 45 733 530     | rs77804065  | 6.00E-15       |
| 29 397 368      | Headache                              | 16            | 75 292 035     | rs1011121   | 1.00E-08       |
| 28 928 442      | Tuberculosis                          | 6             | 32 710 069     | rs4947344   | 1.00E-24       |
| 28 928 442      | Shingles                              | 6             | 29 197 260     | rs114224598 | 6.00E-09       |
| 28 928 442      | Shingles                              | 6             | 29 094 774     | rs115166140 | 1.00E-09       |
| 28 928 442      | Shingles                              | 6             | 31 477 787     | rs17206973  | 2.00E-22       |
| 28 928 442      | Shingles                              | 6             | 29 872 466     | rs2523815   | 2.00E-22       |
| 28 928 442      | Shingles                              | 6             | 30 118 645     | rs9261431   | 2.00E-19       |
| 28 928 442      | Shingles                              | 6             | 31 200 620     | rs9263868   | 4.00E-21       |
| 28 928 442      | Shingles                              | 6             | 29 973 654     | rs9295825   | 3.00E-18       |
| 28 928 442      | Shingles                              | 6             | 28 928 998     | rs9468445   | 4.00E-09       |
| 28 928 442      | Tonsillectomy                         | 6             | 32 482 803     | rs35957722  | 4.00E-10       |
| 28 928 442      | Tonsillectomy                         | 9             | 133 279 427    | rs635634    | 8.00E-09       |
| 26 634 245      | Post bronchodilator FEV1/FVC ratio    | 15            | 78 521 704     | rs10519203  | 2.00E-12       |
| 26 634 245      | Post bronchodilator FEV1/FVC ratio    | 15            | 78 510 527     | rs9788721   | 2.00E-14       |
| 26 634 245      | Post bronchodilator FEV1/FVC ratio    | 15            | 78 603 787     | rs1317286   | 3.00E-14       |

(Continued)

**Supplementary Table SV Continued.**

| <b>PUBMEDID</b> | <b>DISEASE.TRAIT</b>                                                                                                                                | <b>CHR_ID</b> | <b>CHR_POS</b> | <b>SNPS</b> | <b>P.VALUE</b> |
|-----------------|-----------------------------------------------------------------------------------------------------------------------------------------------------|---------------|----------------|-------------|----------------|
| 26 634 245      | Post bronchodilator FEV1 /FVC ratio                                                                                                                 | 15            | 78 513 681     | rs8034191   | 6.00E-14       |
| 26 634 245      | Post bronchodilator FEV1 /FVC ratio                                                                                                                 | 15            | 78 556 692     | rs58365910  | 1.00E-15       |
| 26 634 245      | Post bronchodilator FEV1 /FVC ratio                                                                                                                 | 15            | 78 525 587     | rs8042849   | 3.00E-15       |
| 26 634 245      | Post bronchodilator FEV1 /FVC ratio                                                                                                                 | 15            | 78 565 644     | rs55781567  | 6.00E-15       |
| 26 634 245      | Post bronchodilator FEV1 /FVC ratio                                                                                                                 | 15            | 78 509 052     | rs11852372  | 1.00E-13       |
| 26 634 245      | Post bronchodilator FEV1 /FVC ratio                                                                                                                 | 15            | 78 581 651     | rs7180002   | 1.00E-16       |
| 26 634 245      | Post bronchodilator FEV1 /FVC ratio                                                                                                                 | 15            | 78 572 855     | rs17486195  | 1.00E-16       |
| 26 634 245      | Post bronchodilator FEV1 /FVC ratio                                                                                                                 | 15            | 78 565 597     | rs55853698  | 1.00E-14       |
| 26 634 245      | Post bronchodilator FEV1 /FVC ratio                                                                                                                 | 15            | 78 575 140     | rs17486278  | 4.00E-20       |
| 26 634 245      | Post bronchodilator FEV1 /FVC ratio                                                                                                                 | 15            | 78 606 590     | rs55676755  | 2.00E-19       |
| 26 634 245      | Post bronchodilator FEV1 /FVC ratio                                                                                                                 | 15            | 78 613 835     | rs146009840 | 2.00E-16       |
| 26 634 245      | Post bronchodilator FEV1 /FVC ratio                                                                                                                 | 15            | 78 608 359     | rs138544659 | 8.00E-17       |
| 23 143 594      | Psoriasis                                                                                                                                           | 5             | 96 916 885     | rs2910686   | 2.00E-08       |
| 23 143 594      | Psoriasis                                                                                                                                           | 6             | 31 387 342     | rs13437088  | 3.00E-40       |
| 28 886 342      | Dupuytren's disease                                                                                                                                 | 16            | 75 472 695     | rs977987    | 5.00E-10       |
| 24 097 067      | Sjögren's syndrome                                                                                                                                  | 6             | 32 440 720     | rs3135394   | 5.00E-113      |
| 22 961 000      | Primary biliary cirrhosis                                                                                                                           | 7             | 128 939 148    | rs3807307   | 4.00E-09       |
| 22 961 000      | Primary biliary cirrhosis                                                                                                                           | 17            | 45 929 235     | rs17564829  | 2.00E-09       |
| 28 960 316      | Colorectal cancer                                                                                                                                   | 2             | 218 290 058    | rs992157    | 2.00E-09       |
| 23 143 596      | Rheumatoid arthritis                                                                                                                                | 7             | 128 940 626    | rs3807306   | 7.00E-10       |
| 23 143 596      | Rheumatoid arthritis (ACPA-positive)                                                                                                                | 7             | 128 940 626    | rs3807306   | 5.00E-10       |
| 23 143 596      | Rheumatoid arthritis (ACPA-positive)                                                                                                                | 9             | 120 921 291    | rs2269060   | 2.00E-08       |
| 23 603 761      | Juvenile idiopathic arthritis (oligoarticular or rheumatoid factor-negative polyarticular)                                                          | 5             | 97 021 474     | rs27293     | 7.00E-09       |
| 28 898 252      | Glycated hemoglobin levels                                                                                                                          | 9             | 133 278 724    | rs579459    | 9.00E-09       |
| 27 863 252      | Reticulocyte fraction of red cells                                                                                                                  | 2             | 218 274 217    | rs4791      | 3.00E-18       |
| 28 394 258      | Aortic root size                                                                                                                                    | 16            | 75 359 454     | rs17696696  | 3.00E-10       |
| 27 723 757      | Vitiligo                                                                                                                                            | 4             | 101 302 229    | rs1031034   | 3.00E-08       |
| 26 974 007      | Chronic inflammatory diseases (ankylosing spondylitis, Crohn's disease, psoriasis, primary sclerosing cholangitis, ulcerative colitis) (pleiotropy) | 2             | 60 977 721     | rs7608910   | 2.00E-32       |
| 26 974 007      | Chronic inflammatory diseases (ankylosing spondylitis, Crohn's disease, psoriasis, primary sclerosing cholangitis, ulcerative colitis) (pleiotropy) | 2             | 218 145 423    | rs11676348  | 2.00E-11       |
| 26 974 007      | Chronic inflammatory diseases (ankylosing spondylitis, Crohn's disease, psoriasis, primary sclerosing cholangitis, ulcerative colitis) (pleiotropy) | 5             | 96 916 885     | rs2910686   | 2.00E-21       |
| 25 608 926      | Alopecia areata                                                                                                                                     | 6             | 32 707 332     | rs9275524   | 2.00E-60       |
| 25 608 926      | Alopecia areata                                                                                                                                     | 12            | 56 088 396     | rs2292239   | 4.00E-09       |
| 22 057 235      | Celiac disease                                                                                                                                      | 2             | 60 959 694     | rs13003464  | 4.00E-16       |
| 28 199 695      | Perceived unattractiveness to mosquitoes                                                                                                            | 6             | 32 701 241     | rs1612904   | 1.00E-08       |
| 28 199 695      | Itch intensity from mosquito bite                                                                                                                   | 6             | 32 632 226     | rs3104376   | 2.00E-28       |
| 28 199 695      | Mosquito bite size                                                                                                                                  | 6             | 32 465 192     | rs9268925   | 1.00E-23       |
| 28 199 695      | Mosquito bite size                                                                                                                                  | 6             | 32 704 312     | rs3134995   | 4.00E-26       |
| 28 199 695      | Itch intensity from mosquito bite adjusted by bite size                                                                                             | 6             | 31 411 527     | rs2853977   | 1.00E-10       |
| 28 199 695      | Itch intensity from mosquito bite adjusted by bite size                                                                                             | 6             | 32 701 241     | rs1612904   | 1.00E-13       |

(Continued)

**Supplementary Table SV Continued.**

| <b>PUBMEDID</b> | <b>DISEASE.TRAIT</b>                                                                                                                                                       | <b>CHR_ID</b> | <b>CHR_POS</b> | <b>SNPS</b> | <b>P.VALUE</b> |
|-----------------|----------------------------------------------------------------------------------------------------------------------------------------------------------------------------|---------------|----------------|-------------|----------------|
| 19 838 195      | Systemic lupus erythematosus                                                                                                                                               | 6             | 34 856 859     | rs11755393  | 2.00E-08       |
| 19 838 195      | Systemic lupus erythematosus                                                                                                                                               | 6             | 32 440 720     | rs3135394   | 2.00E-60       |
| 28 240 269      | Blood protein levels                                                                                                                                                       | 9             | 133 278 431    | rs651007    | 4.00E-44       |
| 28 240 269      | Blood protein levels                                                                                                                                                       | 2             | 272 203        | rs11553746  | 1.00E-257      |
| 28 240 269      | Blood protein levels                                                                                                                                                       | 20            | 35 762 744     | rs2425143   | 4.00E-73       |
| 28 240 269      | Blood protein levels                                                                                                                                                       | 5             | 96 802 179     | rs26496     | 6.00E-123      |
| 28 240 269      | Blood protein levels                                                                                                                                                       | 6             | 31 422 007     | rs2844511   | 4.00E-119      |
| 28 240 269      | Blood protein levels                                                                                                                                                       | 3             | 46 575 847     | rs3806701   | 4.00E-145      |
| 28 240 269      | Blood protein levels                                                                                                                                                       | 9             | 133 278 431    | rs651007    | 1.00E-96       |
| 28 240 269      | Blood protein levels                                                                                                                                                       | 9             | 133 278 431    | rs651007    | 3.00E-19       |
| 28 240 269      | Blood protein levels                                                                                                                                                       | 9             | 133 278 431    | rs651007    | 8.00E-11       |
| 28 240 269      | Blood protein levels                                                                                                                                                       | 9             | 133 278 431    | rs651007    | 7.00E-13       |
| 28 240 269      | Blood protein levels                                                                                                                                                       | 9             | 133 278 431    | rs651007    | 1.00E-31       |
| 28 240 269      | Blood protein levels                                                                                                                                                       | 9             | 133 278 431    | rs651007    | 5.00E-12       |
| 28 240 269      | Blood protein levels                                                                                                                                                       | 9             | 133 278 431    | rs651007    | 7.00E-13       |
| 28 240 269      | Blood protein levels                                                                                                                                                       | 9             | 133 278 431    | rs651007    | 8.00E-09       |
| 28 240 269      | Blood protein levels                                                                                                                                                       | 2             | 254 215        | rs17713879  | 2.00E-215      |
| 28 240 269      | Blood protein levels                                                                                                                                                       |               |                | rs3869132   | 1.00E-91       |
| 28 240 269      | Blood protein levels                                                                                                                                                       | 1             | 150 706 557    | rs1336900   | 1.00E-19       |
| 28 240 269      | Blood protein levels                                                                                                                                                       | 6             | 32 698 749     | rs1794282   | 3.00E-19       |
| 28 604 730      | Lung adenocarcinoma                                                                                                                                                        | 15            | 78 565 644     | rs55781567  | 3.00E-48       |
| 28 566 273      | Type 2 diabetes                                                                                                                                                            | 9             | 133 279 427    | rs635634    | 2.00E-08       |
| 28 566 273      | Type 2 diabetes                                                                                                                                                            | 11            | 43 856 384     | rs1061810   | 4.00E-10       |
| 28 714 975      | Coronary artery disease (myocardial infarction, percutaneous transluminal coronary angioplasty, coronary artery bypass grafting, angina or chronic ischemic heart disease) | 1             | 222 650 401    | rs67180937  | 9.00E-14       |
| 27 989 323      | Stem cell growth factor beta levels                                                                                                                                        | 5             | 177 404 118    | rs17876031  | 2.00E-09       |
| 21 829 393      | Type 1 diabetes                                                                                                                                                            | 12            | 56 088 396     | rs2292239   | 3.00E-27       |
| 21 829 393      | Type 1 diabetes                                                                                                                                                            | 12            | 56 018 703     | rs1701704   | 5.00E-18       |
| 25 521 368      | Circulating chemerin levels                                                                                                                                                | 7             | 150 316 304    | rs7806429   | 8.00E-14       |
| 25 521 368      | Circulating chemerin levels                                                                                                                                                | 7             | 150 353 338    | rs10259796  | 2.00E-10       |
| 28 520 984      | Smoking status (heavy vs light)                                                                                                                                            | 15            | 78 601 997     | rs1051730   | 2.00E-08       |
| 27 863 252      | Neutrophil percentage of white cells                                                                                                                                       | 1             | 150 678 699    | rs11800059  | 9.00E-19       |
| 27 863 252      | Basophil percentage of white cells                                                                                                                                         | 6             | 31 412 752     | rs2256183   | 1.00E-09       |
| 28 604 731      | Chronotype                                                                                                                                                                 | 2             | 54 127 790     | rs1075265   | 1.00E-08       |
| 28 240 269      | Blood protein levels                                                                                                                                                       | 6             | 31 289 734     | rs2853928   | 3.00E-12       |
| 28 240 269      | Blood protein levels                                                                                                                                                       | 6             | 28 301 047     | rs33932084  | 4.00E-16       |
| 28 240 269      | Blood protein levels                                                                                                                                                       | 9             | 133 278 431    | rs651007    | 6.00E-26       |
| 28 240 269      | Blood protein levels                                                                                                                                                       | 9             | 133 278 431    | rs651007    | 7.00E-15       |
| 28 240 269      | Blood protein levels                                                                                                                                                       | 9             | 133 278 431    | rs651007    | 1.00E-29       |
| 28 240 269      | Blood protein levels                                                                                                                                                       | 9             | 133 278 431    | rs651007    | 5.00E-11       |
| 28 240 269      | Blood protein levels                                                                                                                                                       | 9             | 133 278 431    | rs651007    | 3.00E-12       |
| 28 240 269      | Blood protein levels                                                                                                                                                       | 9             | 133 278 431    | rs651007    | 3.00E-13       |
| 28 240 269      | Blood protein levels                                                                                                                                                       | 1             | 45 681 140     | rs6662572   | 6.00E-11       |

(Continued)

**Supplementary Table SV Continued.**

| <b>PUBMEDID</b> | <b>DISEASE.TRAIT</b>                                                                      | <b>CHR_ID</b> | <b>CHR_POS</b> | <b>SNPS</b> | <b>P.VALUE</b> |
|-----------------|-------------------------------------------------------------------------------------------|---------------|----------------|-------------|----------------|
| 28334899        | LDL cholesterol levels                                                                    | 9             | 133278724      | rs579459    | 7.00E-13       |
| 28334899        | LDL cholesterol levels                                                                    | 9             | 133278724      | rs579459    | 2.00E-51       |
| 28334899        | LDL cholesterol levels                                                                    | 9             | 133278724      | rs579459    | 2.00E-09       |
| 28334899        | Total cholesterol levels                                                                  | 9             | 133278724      | rs579459    | 7.00E-13       |
| 28334899        | Total cholesterol levels                                                                  | 9             | 133278724      | rs579459    | 4.00E-49       |
| 28334899        | Total cholesterol levels                                                                  | 20            | 35566823       | rs7264396   | 4.00E-12       |
| 28334899        | Total cholesterol levels                                                                  | 9             | 133278724      | rs579459    | 5.00E-10       |
| 28292921        | Urinary 1,3-butadiene metabolite levels in smokers                                        | 22            | 23897951       | rs5760092   | 3.00E-09       |
| 28452372        | Glomerular filtration rate (creatinine)                                                   | 15            | 45349027       | rs2453533   | 3.00E-43       |
| 28135244        | Pulse pressure                                                                            | 2             | 20682080       | rs2289081   | 6.00E-12       |
| 27020472        | Spherical equivalent (joint analysis main effects and education interaction)              | 2             | 286756         | rs60843830  | 4.00E-08       |
| 27020472        | Spherical equivalent (joint analysis main effects and education interaction)              | 2             | 286756         | rs60843830  | 1.00E-09       |
| 27393504        | Lung cancer                                                                               | 15            | 78565644       | rs55781567  | 1.00E-09       |
| 27863252        | Hemoglobin concentration                                                                  | 6             | 29949108       | rs9260313   | 1.00E-15       |
| 27863252        | Hemoglobin concentration                                                                  | 6             | 31274306       | rs2524081   | 5.00E-11       |
| 27863252        | Hemoglobin concentration                                                                  | 17            | 45733706       | rs17563683  | 3.00E-26       |
| 27863252        | Lymphocyte counts                                                                         | 2             | 113216055      | rs2019137   | 4.00E-11       |
| 27863252        | Lymphocyte counts                                                                         | 9             | 120922814      | rs1014530   | 9.00E-11       |
| 27863252        | Lymphocyte percentage of white cells                                                      | 17            | 46112492       | rs76640332  | 5.00E-13       |
| 27863252        | Myeloid white cell count                                                                  | 6             | 31272944       | rs2249742   | 5.00E-71       |
| 27863252        | Myeloid white cell count                                                                  | 6             | 31306521       | rs9264941   | 6.00E-44       |
| 27863252        | Myeloid white cell count                                                                  | 6             | 32623176       | rs9271588   | 9.00E-68       |
| 27863252        | Myeloid white cell count                                                                  | 9             | 133279427      | rs635634    | 8.00E-23       |
| 27863252        | Monocyte percentage of white cells                                                        | 1             | 150602219      | rs11204677  | 3.00E-41       |
| 28443625        | Waist-to-hip ratio adjusted for BMI (joint analysis main effects and smoking interaction) | 6             | 31268790       | rs1049281   | 2.00E-10       |
| 28443625        | Waist-to-hip ratio adjusted for BMI (joint analysis main effects and smoking interaction) | 6             | 32413959       | rs7759742   | 1.00E-08       |
| 27989323        | Macrophage Migration Inhibitory Factor levels                                             | 22            | 23908608       | rs2330634   | 5.00E-10       |
| 29059683        | Breast cancer                                                                             | 17            | 46788237       | rs199498    | 2.00E-08       |
| 29059683        | Breast cancer                                                                             | 6             | 28106103       | rs34662244  | 3.00E-09       |
| 29059683        | Breast cancer                                                                             | 6             | 27873148       | rs45509595  | 5.00E-09       |
| 29059683        | Breast cancer                                                                             | 17            | 45394123       | rs4763      | 2.00E-08       |
| 29059683        | Breast cancer                                                                             | 17            | 45941122       | rs62061734  | 8.00E-12       |
| 29058716        | Breast cancer                                                                             | 8             | 220692         | rs66823261  | 3.00E-08       |
| 29058716        | Breast cancer (estrogen-receptor negative)                                                | 8             | 220692         | rs66823261  | 6.00E-09       |
| 29146897        | Male-pattern baldness                                                                     | 17            | 45988374       | rs919462    | 1.00E-26       |
| 29186694        | Cognitive ability                                                                         | 17            | 46085231       | rs8080583   | 1.00E-08       |
| 29186694        | Cognitive ability (MTAG)                                                                  | 12            | 56023144       | rs2456973   | 1.00E-08       |
| 29186694        | Cognitive ability (MTAG)                                                                  | 17            | 45913906       | rs17563986  | 5.00E-12       |
| 28135244        | Systolic blood pressure                                                                   | 1             | 88894475       | rs10922502  | 2.00E-15       |
| 28031287        | Cerebrospinal fluid biomarker levels                                                      | 3             | 46559030       | rs6783573   | 1.00E-15       |
| 28031287        | Cerebrospinal fluid biomarker levels                                                      | 6             | 31386783       | rs13437082  | 1.00E-10       |
| 28031287        | Cerebrospinal fluid biomarker levels                                                      | 2             | 285471         | rs17714252  | 5.00E-09       |

(Continued)



**Supplementary Table SV Continued.**

| PUBMEDID   | DISEASE.TRAIT                                                                                            | CHR_ID | CHR_POS     | SNPS        | P.VALUE   |
|------------|----------------------------------------------------------------------------------------------------------|--------|-------------|-------------|-----------|
| 29 617 998 | Intraocular pressure                                                                                     | 1      | 88 878 573  | rs10127863  | 9.00E-10  |
| 29 617 998 | Intraocular pressure                                                                                     | 1      | 88 805 891  | rs786906    | 5.00E-09  |
| 26 426 971 | Waist-to-hip ratio adjusted for BMI x sex x age interaction (4df test)                                   | 6      | 32 413 959  | rs7759742   | 2.00E-12  |
| 26 426 971 | Body mass index                                                                                          | 17     | 36 558 947  | rs12150665  | 3.00E-13  |
| 26 426 971 | Body mass index                                                                                          | 11     | 43 620 580  | rs4755726   | 7.00E-09  |
| 26 426 971 | Body mass index                                                                                          | 11     | 43 842 728  | rs2176598   | 1.00E-08  |
| 29 662 059 | Depression (broad)                                                                                       | 6      | 27 878 966  | rs483143    | 8.00E-12  |
| 29 662 059 | Depression (broad)                                                                                       | 6      | 28 092 461  | rs13197574  | 1.00E-11  |
| 29 083 406 | Allergic disease (asthma, hay fever or eczema)                                                           | 5      | 177 355 217 | rs13153019  | 1.00E-08  |
| 29 083 406 | Allergic disease (asthma, hay fever or eczema)                                                           | 6      | 31 355 235  | rs2854001   | 1.00E-19  |
| 29 083 406 | Allergic disease (asthma, hay fever or eczema)                                                           | 9      | 120 888 256 | rs10760123  | 5.00E-09  |
| 29 083 406 | Allergic disease (asthma, hay fever or eczema)                                                           | 12     | 56 007 301  | rs10876864  | 1.00E-19  |
| 23 749 187 | Ankylosing spondylitis                                                                                   | 5      | 96 916 885  | rs2910686   | 5.00E-17  |
| 29 030 599 | Parental lifespan                                                                                        | 6      | 32 622 991  | rs34831921  | 4.00E-08  |
| 29 030 599 | Parental lifespan                                                                                        | 15     | 78 525 587  | rs8042849   | 4.00E-14  |
| 29 059 683 | Breast cancer                                                                                            | 5      | 82 242 227  | rs7707921   | 2.00E-12  |
| 29 059 683 | Breast cancer                                                                                            | 5      | 81 972 251  | rs111549985 | 6.00E-12  |
| 28 604 728 | Testicular germ cell tumor                                                                               | 21     | 46 270 154  | rs2839186   | 7.00E-12  |
| 27 863 252 | Monocyte count                                                                                           | 2      | 218 323 178 | rs1870125   | 1.00E-16  |
| 27 863 252 | Monocyte count                                                                                           | 18     | 79 712 436  | rs12458462  | 8.00E-09  |
| 28 604 730 | Lung cancer                                                                                              | 6      | 27 901 014  | rs13199649  | 2.00E-10  |
| 28 604 730 | Lung cancer                                                                                              | 6      | 28 314 117  | rs34661125  | 2.00E-12  |
| 28 604 730 | Lung cancer                                                                                              | 15     | 78 565 644  | rs55781567  | 3.00E-103 |
| 28 604 730 | Squamous cell lung carcinoma                                                                             | 6      | 27 916 234  | rs13218875  | 2.00E-10  |
| 28 604 730 | Squamous cell lung carcinoma                                                                             | 6      | 28 282 402  | rs34878803  | 4.00E-11  |
| 28 604 730 | Small cell lung carcinoma                                                                                | 15     | 78 565 597  | rs55853698  | 5.00E-21  |
| 28 604 730 | Lung cancer in ever smokers                                                                              | 6      | 27 916 234  | rs13218875  | 1.00E-08  |
| 28 604 730 | Lung cancer in ever smokers                                                                              | 6      | 28 106 103  | rs34662244  | 2.00E-09  |
| 28 604 730 | Lung cancer in ever smokers                                                                              | 6      | 28 336 607  | rs67340775  | 7.00E-10  |
| 28 604 730 | Lung cancer in ever smokers                                                                              | 15     | 78 565 644  | rs55781567  | 2.00E-78  |
| 29 212 778 | Coronary artery disease                                                                                  | 16     | 75 408 245  | rs8046696   | 2.00E-16  |
| 29 212 778 | Coronary artery disease                                                                                  | 1      | 222 656 208 | rs35158675  | 6.00E-28  |
| 29 273 806 | Asthma                                                                                                   | 6      | 32 636 595  | rs9272346   | 6.00E-24  |
| 29 273 806 | Asthma                                                                                                   | 6      | 32 636 595  | rs9272346   | 2.00E-28  |
| 27 618 448 | Diastolic blood pressure                                                                                 | 6      | 78 945 760  | rs10943605  | 3.00E-09  |
| 29 521 573 | Neutralising antibody response to interferon beta therapy in multiple sclerosis (presence of antibodies) | 6      | 32 614 145  | rs522308    | 2.00E-15  |
| 29 534 301 | Response to hepatitis B vaccine                                                                          | 6      | 32 696 555  | rs7745040   | 2.00E-10  |
| 29 691 431 | Hand grip strength                                                                                       | 6      | 34 825 347  | rs9469899   | 3.00E-15  |
| 29 691 431 | Hand grip strength                                                                                       | 6      | 29 938 536  | rs453325    | 2.00E-08  |
| 29 691 431 | Hand grip strength                                                                                       | 17     | 45 849 924  | rs17769552  | 2.00E-08  |
| 29 545 352 | Urinary metabolite concentrations in chronic kidney disease                                              | 1      | 151 982 754 | rs6587640   | 9.00E-09  |
| 29 545 352 | Urinary metabolite ratios in chronic kidney disease                                                      | 1      | 151 967 388 | rs6657658   | 1.00E-12  |
| 29 545 352 | Serum metabolite concentrations in chronic kidney disease                                                | 1      | 151 907 285 | rs28415528  | 4.00E-09  |

(Continued)

**Supplementary Table SV Continued.**

| <b>PUBMEDID</b> | <b>DISEASE.TRAIT</b>                                                                     | <b>CHR_ID</b> | <b>CHR_POS</b> | <b>SNPS</b> | <b>P.VALUE</b> |
|-----------------|------------------------------------------------------------------------------------------|---------------|----------------|-------------|----------------|
| 26651848        | Sarcoidosis (non-Lofgren's syndrome without extrapulmonary manifestations)               | 6             | 32481634       | rs1964995   | 4.00E-15       |
| 28921602        | Hepatocellular carcinoma in hepatitis C infection                                        | 6             | 32699985       | rs2856723   | 3.00E-43       |
| 26651848        | Sarcoidosis (Lofgren's syndrome vs non-Lofgren's syndrome)                               | 6             | 28092461       | rs13197574  | 3.00E-17       |
| 26651848        | Sarcoidosis (Lofgren's syndrome vs non-Lofgren's syndrome)                               | 6             | 32440720       | rs3135394   | 3.00E-33       |
| 26651848        | Sarcoidosis (Lofgren's syndrome vs non-Lofgren's syndrome)                               | 6             | 32638107       | rs2187668   | 5.00E-36       |
| 29404672        | Random C-peptide levels in type I diabetes                                               | 6             | 32700662       | rs3135002   | 3.00E-08       |
| 29617998        | Intraocular pressure                                                                     | 11            | 791462         | rs4963153   | 2.00E-24       |
| 29617998        | Intraocular pressure                                                                     | 11            | 780827         | rs4963156   | 4.00E-23       |
| 24532676        | Rheumatoid arthritis (ACPA-positive)                                                     | 9             | 120900340      | rs10760126  | 4.00E-12       |
| 29808027        | Myopia (age of diagnosis)                                                                | 12            | 9282648        | rs1549426   | 2.00E-08       |
| 29455858        | Systolic blood pressure x smoking status (current vs non-current) interaction (2df test) | 16            | 75409285       | rs4888411   | 2.00E-18       |
| 29455858        | Systolic blood pressure x smoking status (current vs non-current) interaction (2df test) | 16            | 75409285       | rs4888411   | 2.00E-12       |
| 29455858        | Systolic blood pressure x smoking status (ever vs never) interaction (2df test)          | 16            | 75409285       | rs4888411   | 1.00E-18       |
| 29455858        | Systolic blood pressure x smoking status (ever vs never) interaction (2df test)          | 16            | 75409285       | rs4888411   | 1.00E-12       |
| 30012571        | Childhood steroid-sensitive nephrotic syndrome                                           | 6             | 32689766       | rs4642516   | 7.00E-13       |
| 29844566        | Reaction time                                                                            | 17            | 45949373       | rs242562    | 2.00E-09       |
| 29844566        | Reaction time                                                                            | 17            | 45985237       | rs6503453   | 3.00E-09       |
| 29844566        | Reaction time                                                                            | 17            | 45998697       | rs2471738   | 6.00E-15       |
| 30054594        | Intraocular pressure                                                                     | 17            | 46759851       | rs199529    | 4.00E-08       |
| 30061737        | Atrial fibrillation                                                                      | 2             | 61242991       | rs11125871  | 6.00E-09       |
| 30061737        | Atrial fibrillation                                                                      | 17            | 46797087       | rs1563304   | 3.00E-12       |
| 29844566        | General cognitive ability                                                                | 6             | 28121953       | rs66886492  | 2.00E-15       |
| 29844566        | General cognitive ability                                                                | 17            | 45948522       | rs242559    | 1.00E-13       |
| 29844566        | General cognitive ability                                                                | 12            | 56034024       | rs1702877   | 6.00E-12       |
| 29844566        | General cognitive ability                                                                | 17            | 45987897       | rs713522    | 1.00E-11       |
| 29844566        | General cognitive ability                                                                | 17            | 45704381       | rs1724425   | 7.00E-11       |
| 29844566        | General cognitive ability                                                                | 17            | 45900480       | rs28646281  | 1.00E-10       |
| 29844566        | General cognitive ability                                                                | 17            | 45705974       | rs1526123   | 2.00E-10       |
| 29844566        | General cognitive ability                                                                | 17            | 46788073       | rs2074404   | 2.00E-10       |
| 29844566        | General cognitive ability                                                                | 6             | 26796028       | rs2451729   | 4.00E-10       |
| 29844566        | General cognitive ability                                                                | 20            | 35839270       | rs2425161   | 1.00E-09       |
| 29844566        | General cognitive ability                                                                | 17            | 45998697       | rs2471738   | 2.00E-09       |
| 29844566        | General cognitive ability                                                                | 6             | 29964515       | rs2523933   | 2.00E-09       |
| 29844566        | General cognitive ability                                                                | 15            | 82552642       | rs3850610   | 3.00E-09       |
| 29844566        | General cognitive ability                                                                | 17            | 45777136       | rs12938031  | 6.00E-09       |
| 29844566        | General cognitive ability                                                                | 17            | 45779092       | rs35076622  | 6.00E-09       |
| 29844566        | General cognitive ability                                                                | 17            | 45383525       | rs61572747  | 1.00E-08       |
| 29844566        | General cognitive ability                                                                | 6             | 29967628       | rs3893463   | 2.00E-08       |
| 29844566        | General cognitive ability                                                                | 17            | 45977330       | rs754593    | 2.00E-08       |

(Continued)

**Supplementary Table SV Continued.**

| <b>PUBMEDID</b> | <b>DISEASE.TRAIT</b>                                                     | <b>CHR_ID</b> | <b>CHR_POS</b> | <b>SNPS</b> | <b>P.VALUE</b> |
|-----------------|--------------------------------------------------------------------------|---------------|----------------|-------------|----------------|
| 29 844 566      | General cognitive ability                                                | 6             | 30 092 264     | rs3132681   | 2.00E-08       |
| 29 844 566      | General cognitive ability                                                | 6             | 29 966 245     | rs6914699   | 3.00E-08       |
| 29 844 566      | General cognitive ability                                                | 17            | 46 006 582     | rs8067056   | 3.00E-08       |
| 29 403 010      | Serum alkaline phosphatase levels                                        | 1             | 21 468 895     | rs1827293   | 2.00E-106      |
| 29 403 010      | Gamma glutamyl transferase levels                                        | 22            | 23 914 707     | rs5996631   | 8.00E-42       |
| 29 403 010      | Prothrombin time                                                         | 1             | 94 785 004     | rs7521392   | 1.00E-10       |
| 29 767 774      | Current cigarettes per day in chronic obstructive pulmonary disease      | 15            | 78 593 856     | rs8192482   | 2.00E-15       |
| 29 531 354      | Ischemic stroke                                                          | 9             | 133 279 427    | rs635634    | 9.00E-09       |
| 29 777 097      | Alzheimer's disease or family history of Alzheimer's disease             | 6             | 32 610 753     | rs9271192   | 7.00E-10       |
| 29 892 016      | Prostate cancer                                                          | 6             | 34 825 347     | rs9469899   | 5.00E-09       |
| 25 817 017      | Giant cell arteritis                                                     | 6             | 32 601 914     | rs477515    | 4.00E-40       |
| 29 899 525      | Accelerometer-based physical activity measurement (average acceleration) | 17            | 45 767 194     | rs55657917  | 5.00E-12       |
| 27 386 562      | Multiple sclerosis                                                       | 6             | 32 632 598     | rs3104373   | 1.00E-234      |
| 29 892 016      | Prostate cancer                                                          | 2             | 20 678 393     | rs9306895   | 3.00E-21       |
| 29 892 016      | Prostate cancer                                                          | 6             | 30 105 999     | rs7767188   | 2.00E-08       |
| 26 362 759      | Idiopathic inflammatory myopathy                                         | 6             | 32 427 949     | rs3129843   | 9.00E-133      |
| 26 362 759      | Dermatomyositis or juvenile dermatomyositis                              | 6             | 32 427 949     | rs3129843   | 2.00E-48       |
| 29 942 086      | Intelligence                                                             | 20            | 35 632 068     | rs78084033  | 2.00E-08       |
| 29 942 086      | Intelligence                                                             | 15            | 82 144 163     | rs4778665   | 4.00E-09       |
| 29 942 086      | Intelligence                                                             | 15            | 82 734 974     | rs8028130   | 3.00E-09       |
| 23 093 944      | Serum metabolite levels                                                  | 9             | 133 278 431    | rs651007    | 1.00E-15       |
| 23 093 944      | Serum metabolite levels                                                  | 10            | 98 399 379     | rs4488133   | 2.00E-281      |
| 23 093 944      | Serum metabolite levels                                                  | 10            | 98 399 379     | rs4488133   | 1.00E-27       |
| 29 769 526      | Neuromyelitis optica                                                     | 6             | 32 615 876     | rs28383224  | 8.00E-11       |
| 29 769 526      | Neuromyelitis optica                                                     | 6             | 32 615 876     | rs28383224  | 6.00E-12       |
| 29 773 799      | Menarche (age at onset)                                                  | 17            | 43 093 449     | rs1799949   | 3.00E-08       |
| 29 875 488      | Blood protein levels                                                     | 12            | 29 367 773     | rs10128781  | 9.00E-25       |
| 29 403 010      | Mean corpuscular volume                                                  | 10            | 102 727 625    | rs2902548   | 6.00E-10       |
| 29 403 010      | Creatinine levels                                                        | 2             | 113 209 498    | rs11123169  | 5.00E-14       |
| 29 403 010      | Glomerular filtration rate                                               | 2             | 113 209 498    | rs11123169  | 2.00E-15       |
| 29 403 010      | Glomerular filtration rate                                               | 5             | 177 380 196    | rs12659266  | 3.00E-16       |
| 29 403 010      | Phosphorus levels                                                        | 5             | 177 379 635    | rs35716097  | 2.00E-23       |
| 29 403 010      | Phosphorus levels                                                        | 1             | 21 490 592     | rs1106357   | 7.00E-18       |
| 29 875 488      | Blood protein levels                                                     | 15            | 69 267 001     | rs11854180  | 8.00E-245      |
| 29 875 488      | Blood protein levels                                                     | 1             | 88 946 689     | rs12144640  | 3.00E-12       |
| 29 875 488      | Blood protein levels                                                     | 19            | 35 739 273     | rs12459634  | 6.00E-100      |
| 29 875 488      | Blood protein levels                                                     | 20            | 35 630 751     | rs12481228  | 2.00E-146      |
| 29 875 488      | Blood protein levels                                                     | 12            | 6 463 025      | rs12964     | 0              |
| 29 875 488      | Blood protein levels                                                     | 6             | 31 296 356     | rs2524139   | 2.00E-52       |
| 29 875 488      | Blood protein levels                                                     | 6             | 31 295 745     | rs2524142   | 3.00E-22       |
| 29 875 488      | Blood protein levels                                                     | 6             | 31 295 733     | rs2524143   | 2.00E-52       |
| 29 875 488      | Blood protein levels                                                     | 12            | 6 455 044      | rs2532497   | 0              |
| 29 875 488      | Blood protein levels                                                     | 4             | 17 518 443     | rs28719835  | 1.00E-94       |

(Continued)

**Supplementary Table SV Continued.**

| <b>PUBMEDID</b> | <b>DISEASE.TRAIT</b>                                   | <b>CHR_ID</b> | <b>CHR_POS</b> | <b>SNPS</b> | <b>P.VALUE</b> |
|-----------------|--------------------------------------------------------|---------------|----------------|-------------|----------------|
| 29 875 488      | Blood protein levels                                   | 5             | 96 916 728     | rs2927608   | 0              |
| 29 875 488      | Blood protein levels                                   | 5             | 96 794 311     | rs469735    | 6.00E-308      |
| 29 875 488      | Blood protein levels                                   | 9             | 133 279 427    | rs635634    | 1.00E-11       |
| 29 875 488      | Blood protein levels                                   | 9             | 133 279 427    | rs635634    | 3.00E-33       |
| 29 875 488      | Blood protein levels                                   | 9             | 133 279 427    | rs635634    | 1.00E-13       |
| 29 875 488      | Blood protein levels                                   | 9             | 133 279 427    | rs635634    | 4.00E-80       |
| 29 875 488      | Blood protein levels                                   | 9             | 133 279 427    | rs635634    | 5.00E-13       |
| 29 875 488      | Blood protein levels                                   | 9             | 133 279 427    | rs635634    | 6.00E-21       |
| 29 875 488      | Blood protein levels                                   | 9             | 133 279 427    | rs635634    | 2.00E-19       |
| 29 875 488      | Blood protein levels                                   | 9             | 133 279 427    | rs635634    | 3.00E-19       |
| 29 875 488      | Blood protein levels                                   | 9             | 133 279 427    | rs635634    | 7.00E-18       |
| 29 875 488      | Blood protein levels                                   | 9             | 133 279 427    | rs635634    | 3.00E-40       |
| 29 875 488      | Blood protein levels                                   | 6             | 31 304 484     | rs6457374   | 2.00E-34       |
| 29 875 488      | Blood protein levels                                   | 3             | 46 576 229     | rs6769392   | 0              |
| 29 875 488      | Blood protein levels                                   | 2             | 277 003        | rs79716074  | 0              |
| 29 875 488      | Blood protein levels                                   | 6             | 31 303 299     | rs9264845   | 3.00E-16       |
| 29 875 488      | Blood protein levels                                   | 1             | 52 607 725     | rs946155    | 2.00E-61       |
| 29 875 488      | Blood protein levels                                   | 1             | 88 916 981     | rs9787133   | 3.00E-12       |
| 29 875 488      | Blood protein levels                                   | 17            | 50 547 162     | rs9890200   | 9.00E-24       |
| 30 019 117      | Adolescent idiopathic scoliosis                        | 4             | 119 337 052    | rs1814813   | 2.00E-09       |
| 30 019 117      | Adolescent idiopathic scoliosis                        | 4             | 170 258 789    | rs17629735  | 2.00E-08       |
| 30 019 117      | Adolescent idiopathic scoliosis                        | 7             | 76 587 304     | rs11505688  | 4.00E-08       |
| 30 019 117      | Adolescent idiopathic scoliosis                        | 22            | 25 479 606     | rs5996945   | 1.00E-08       |
| 29 785 010      | Intraocular pressure                                   | 6             | 32 619 436     | rs28383314  | 3.00E-09       |
| 29 785 010      | Intraocular pressure                                   | 17            | 46 758 936     | rs9912530   | 2.00E-10       |
| 30 108 127      | Body mass index                                        | 11            | 43 620 580     | rs4755726   | 1.00E-10       |
| 30 108 127      | Body mass index                                        | 11            | 43 842 728     | rs2176598   | 1.00E-09       |
| 30 104 567      | Lung cancer                                            | 15            | 78 601 997     | rs1051730   | 3.00E-49       |
| 30 104 567      | Lung cancer in ever smokers                            | 15            | 78 601 997     | rs1051730   | 3.00E-52       |
| 27 029 810      | Mortality                                              | 15            | 78 521 704     | rs10519203  | 2.00E-17       |
| 30 220 432      | Urinary albumin excretion (no hypertensive medication) | 15            | 45 428 399     | rs16943246  | 1.00E-08       |
| 30 048 462      | Heel bone mineral density                              | 1             | 88 715 162     | rs167365    | 2.00E-16       |
| 30 048 462      | Heel bone mineral density                              | 2             | 159 250 108    | rs113193373 | 2.00E-15       |
| 30 048 462      | Heel bone mineral density                              | 2             | 218 291 184    | rs2382818   | 6.00E-09       |
| 30 048 462      | Heel bone mineral density                              | 6             | 26 093 798     | rs2858996   | 7.00E-10       |
| 30 048 462      | Heel bone mineral density                              | 9             | 133 279 427    | rs635634    | 8.00E-34       |
| 30 048 462      | Heel bone mineral density                              | 10            | 129 481 527    | rs12254582  | 3.00E-20       |
| 30 048 462      | Heel bone mineral density                              | 12            | 29 355 709     | rs10843391  | 1.00E-12       |
| 30 048 462      | Heel bone mineral density                              | 17            | 45 873 610     | rs10491140  | 3.00E-26       |
| 30 048 462      | Heel bone mineral density                              | 17            | 50 556 996     | rs6504675   | 1.00E-09       |
| 30 048 462      | Heel bone mineral density                              | 6             | 29 951 332     | rs9260426   | 6.00E-27       |
| 30 048 462      | Heel bone mineral density                              | 10            | 121 947 868    | rs10749436  | 6.00E-18       |
| 30 150 663      | Cannabis use                                           | 17            | 2 203 796      | rs17761723  | 3.00E-08       |
